# Supplementary material
Source: PubMed Central journal article supplement (PMC6469577)
Supplement: NIHMS82481-supplement-Supplementary_Information.pdf [file NIHMS82481-supplement-Supplementary_Information.pdf]

In the format provided by the authors and unedited.

# BRD4 interacts with NIPBL and *BRD4* is mutated in a Cornelia de Lange-like syndrome

Gabrielle Olley<sup>1</sup>, Morad Ansari<sup>1</sup>, Hemant Bengani<sup>1</sup>, Graeme R. Grimes<sup>2</sup>, James Rhodes<sup>3</sup>, Alex von Kriegsheim<sup>2</sup>, Ana Blatnik<sup>1,4</sup>, Fiona J. Stewart<sup>5</sup>, Emma Wakeling<sup>6</sup>, Nicola Carroll<sup>7</sup>, Alison Ross<sup>8</sup>, Soo-Mi Park<sup>9</sup>, Deciphering Developmental Disorders Study<sup>10</sup>, Wendy A. Bickmore<sup>11\*</sup>, Madapura M. Pradeepa<sup>11\*</sup> and David R. FitzPatrick<sup>11\*</sup>

<sup>1</sup>MRC Human Genetics Unit, MRC Institute of Genetics and Molecular Medicine at the University of Edinburgh, Edinburgh, UK. <sup>2</sup>MRC Institute of Genetics and Molecular Medicine at the University of Edinburgh, Edinburgh, UK. <sup>3</sup>Department of Biochemistry, Oxford University, Oxford, UK. <sup>4</sup>Cancer Genetics Clinic, Institute of Oncology, Ljubljana, Slovenia. <sup>5</sup>Department of Medical Genetics, Belfast City Hospital, Belfast, UK. <sup>6</sup>North West Thames Regional Genetics Service, London North West Healthcare NHS Trust, Harrow, UK. <sup>7</sup>South East Scotland Regional Genetics Services, Western General Hospital, Edinburgh, UK. <sup>8</sup>Department of Medical Genetics, Ashgrove House, Foresterhill, Aberdeen, UK. <sup>9</sup>East Anglian Medical Genetics Service, Clinical Genetics, Addenbrooke's Treatment Centre, Cambridge University Hospitals NHS Foundation Trust, Cambridge, UK. <sup>10</sup>A list of members and affiliations appears in the Supplementary Note. <sup>11</sup>School of Biological Sciences, University of Essex, Colchester, UK. Gabrielle Olley and Morad Ansari contributed equally to this work. \*e-mail: [wendy.bickmore@igmm.ed.ac.uk](mailto:wendy.bickmore@igmm.ed.ac.uk); [pmadap@essex.ac.uk](mailto:pmadap@essex.ac.uk); [david.fitzpatrick@ed.ac.uk](mailto:david.fitzpatrick@ed.ac.uk)

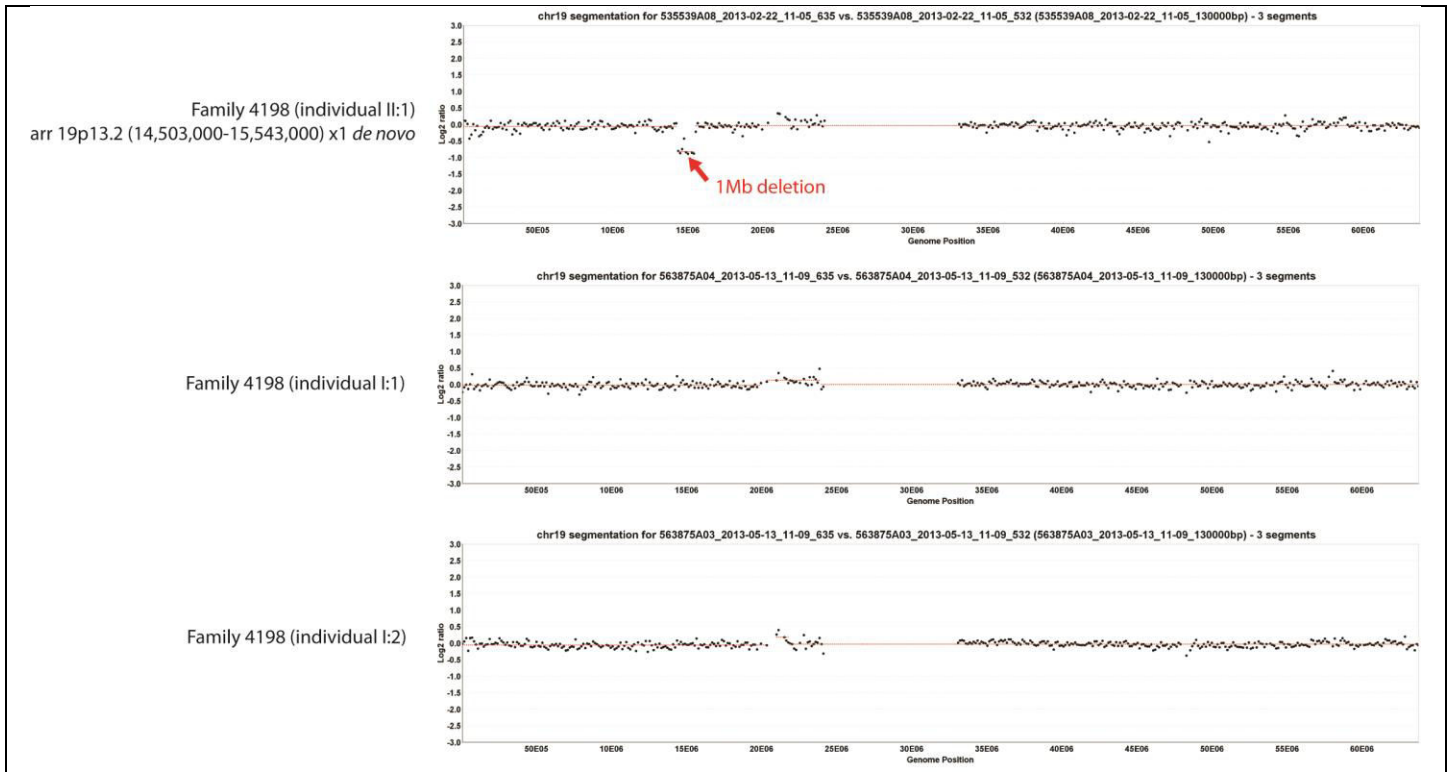

**Supplementary Figure 1**

**A *de novo* heterozygous 1.04Mb deletion in individual II:1 (family 4198; DECIPHER 281165)**

Array CGH identified a 1.04Mb deletion in individual II:1, which is absent in the individual's father (individual I:1) and her mother (individual I:2). The location of the deletion is shown by a red arrow on the log<sub>2</sub> ratio plot of the array CGH.

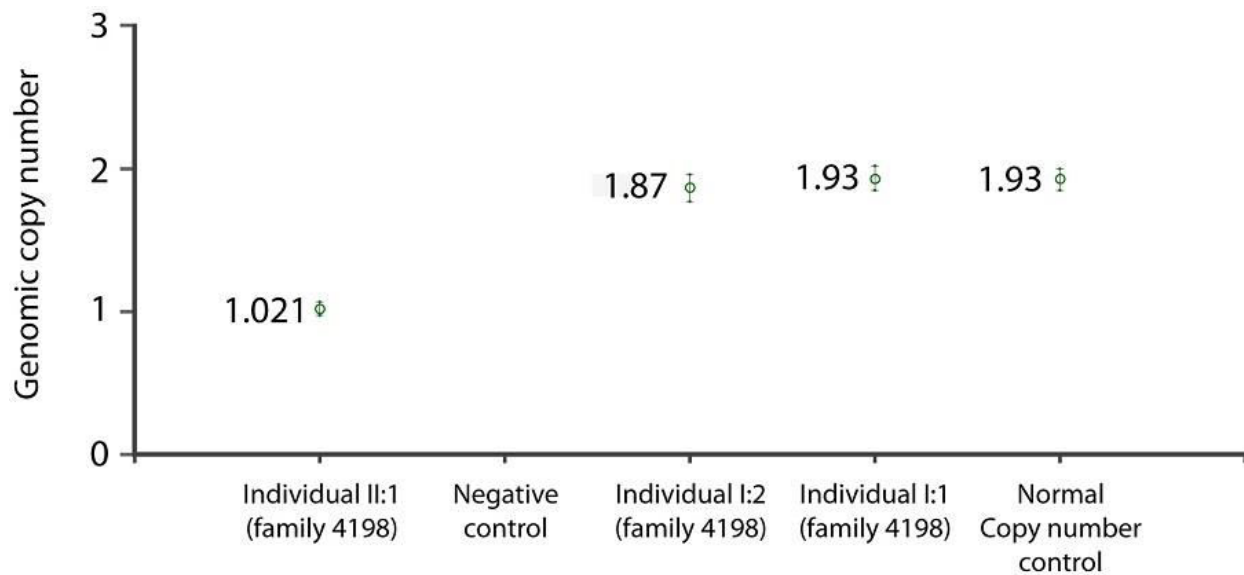

**Supplementary Figure 2**

**Analysis of genomic DNA copy number at the *BRD4* locus using droplet digital PCR (ddPCR)**

ddPCR was used to confirm the heterozygous deletion encompassing *BRD4* in individual II:1 (family 4198; DECIPHER 281165). Per-well Poisson error bars are presented for each sample.

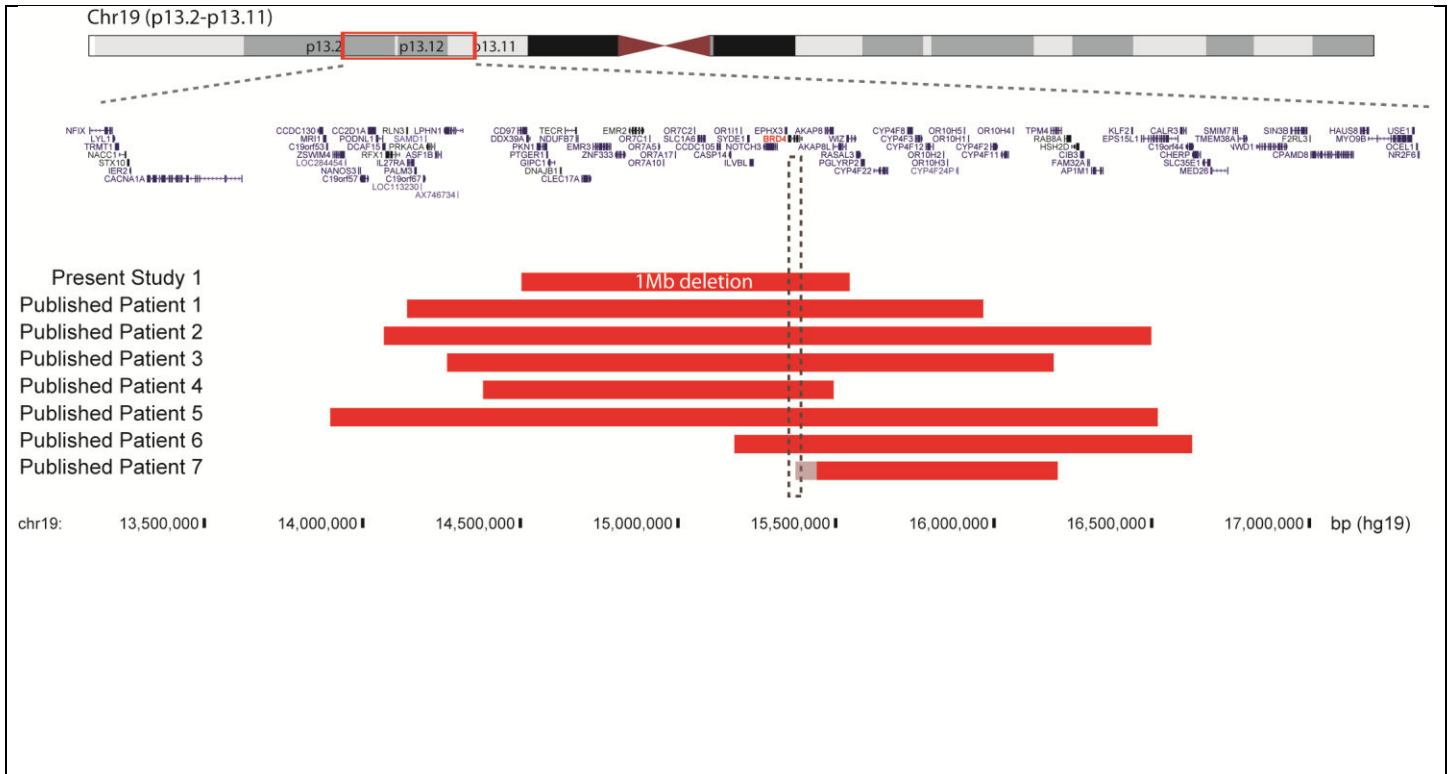

**Supplementary Figure 3**

**Summary of deletions reported in cases of *BRD4* haploinsufficiency**

Locations of the deleted regions are shown as red blocks based on the human genome reference assembly hg19. Published Patient 1 (PMID: 17339581, 20648052), Published Patient 2 (PMID: 19215039), Published Patient 3 (PMID: 20648052), Published Patient 4 (PMID: 20570643), Published Patient 5 (PMID: 21994138), Published Patient 6 (PMID: 22750323), Published Patient 7 (PMID: 21815246)

a.

***Nipbl* het LOF**

75–80% of *Nipbl*<sup>+/−</sup> mice die <= 4 weeks of age

Weight reduction of wild-type  
18–19% in late embryo  
40–50% @ postnatal week 4

microcephaly, brachycephaly,  
upturned nares, reduced size  
of ethmoid & sphenoid  
sunken midface

Corneal opacification

*Nipbl*<sup>+/−</sup> mice have reduced  
white and brown fat

Sensorineural hearing loss

Abnormal neurology and behaviour

Atrial septal defects

**Kawauchi, S. et al.**  
**PLoS Genet 5, e1000650**  
**(2009)**

b.

**shared features**

**perinatal mortality**

**prenatal-onset  
growth failure**

**abnormal craniofacial  
skeleton**

**ocular abnormalities**

**reduced body fat**

c.

***Brd4* het LOF**

By P17 ~ 50% of *Brd4*<sup>+/−</sup>  
mice have died

E10 *Brd4*<sup>+/−</sup> weighed 25% less  
than wild-type littermates.

shorter incisive bone  
short, bent nasal bone  
mandible reduced in length.

cataract in ~20%

reduced subcutaneous  
adipose tissue

necrotic  
hepatocytes

**Houzelstein, D. et al.**  
**Mol Cell Biol 22, 3794-3802**  
**(2002)**

d.

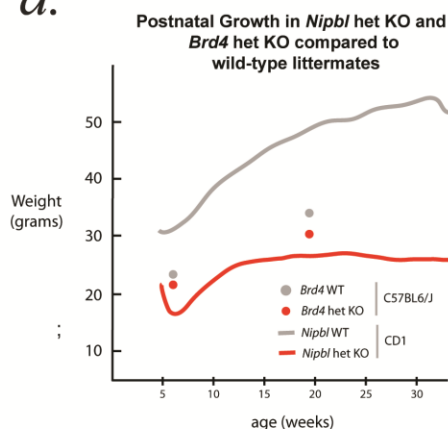

e.

|                                          | postnatal<br>growth<br>retardation | postnatal<br>lethality |
|------------------------------------------|------------------------------------|------------------------|
| <b>hom</b><br><b>(unique genes)</b>      | 965 (709)                          | 1467 (965)             |
| <b>het</b><br><b>(unique genes)</b>      | 132 (98)                           | 220 (153)              |
| <b>het (both)</b>                        |                                    | 41                     |
| <b>autosomal<br/>LOF (not imprinted)</b> |                                    | 13                     |

*Brd4*; *C1galt1c1*; *Chd2*; *Chd7*; *Crebbp*; *Dlk1*; *Fgfr2*;  
*Gria2*; *Hap1*; *Nipbl*; *Nr2f2*; *Rpl27a*; *Rpl38*

**Supplementary Figure 4**

**Comparison of the phenotype associated with haploinsufficiency for *Nipbl* and *Brd4* in previously reported mouse lines**

Mouse phenotype terms (a-c) and graphical representation (d) of growth of *Nipbl* (line) and *Brd4* (filled circles) heterozygous loss of function (het LOF) animals (red) with wild-type controls (grey). The shared phenotypic terms are indicated in red text. e. A review of all reported mouse mutant lines (Mouse Genome Informatics; <http://www.informatics.jax.org>) indicating the 13 het LOF lines sharing postnatal growth retardation and postnatal lethality as features.

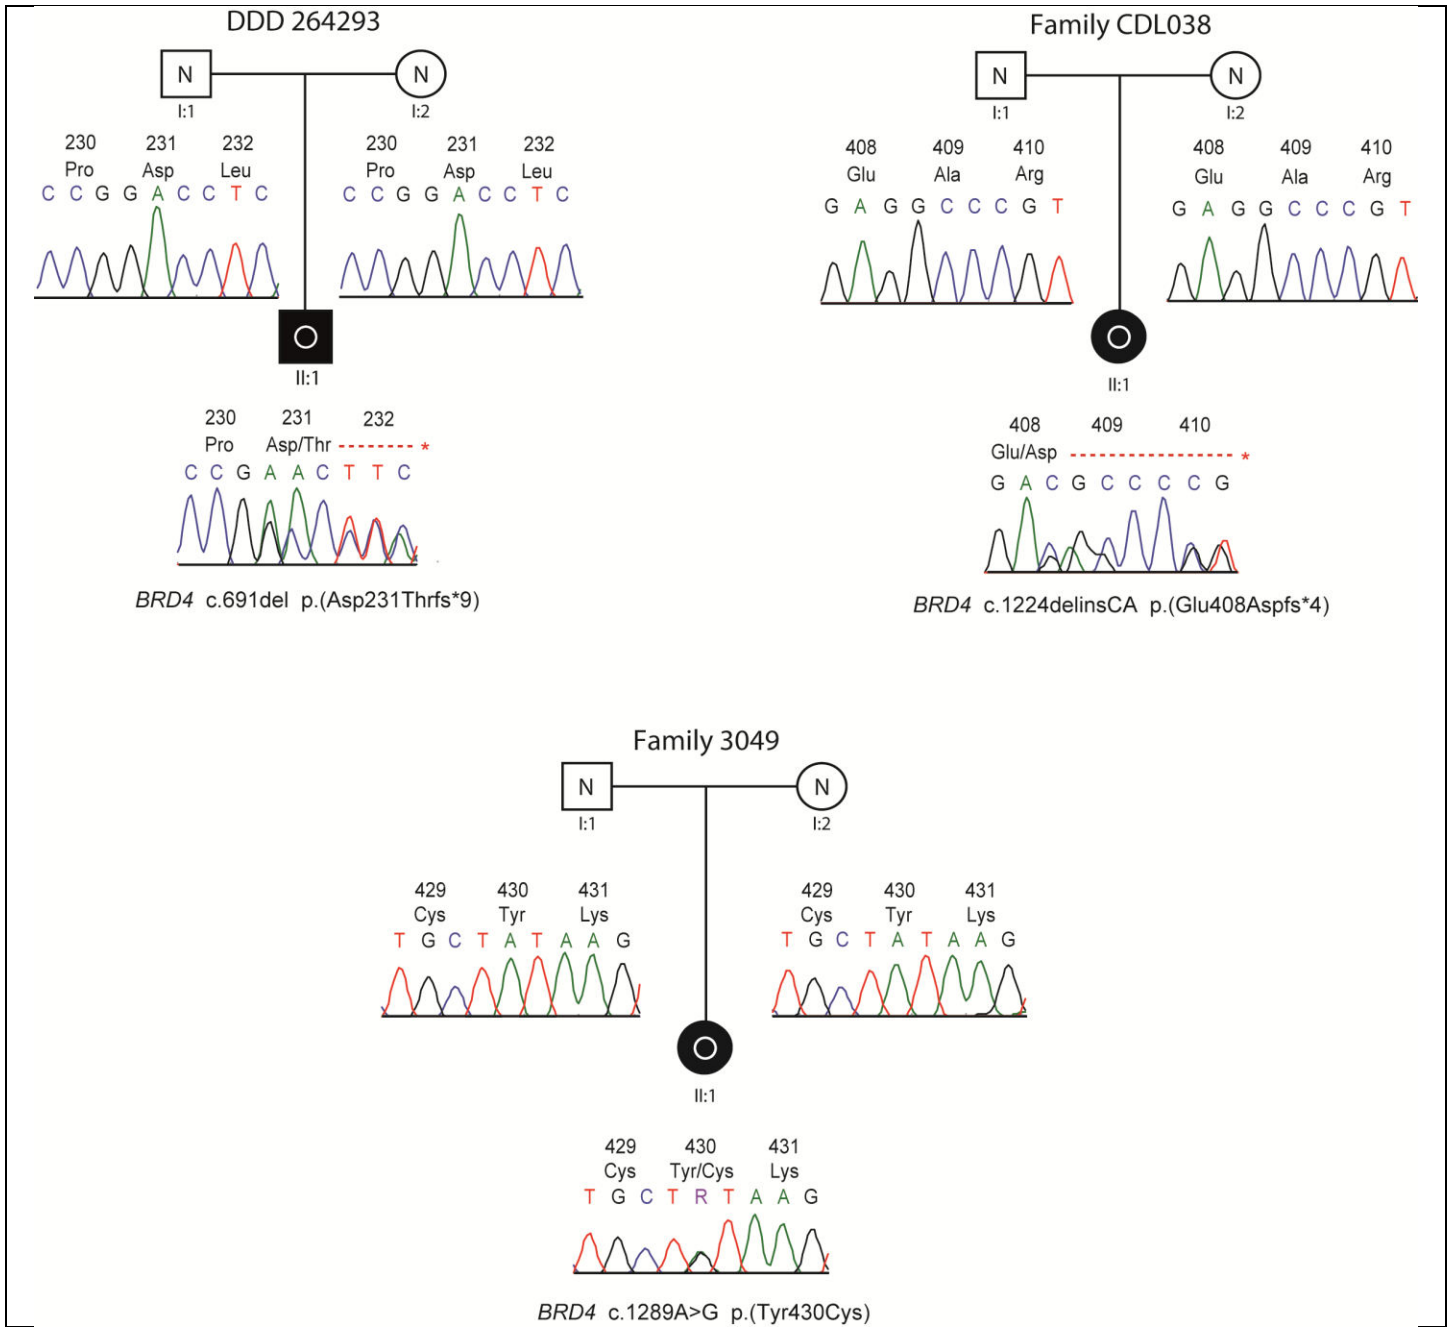

**Supplementary Figure 5**

**Pedigrees of individuals with *de novo* intragenic *BRD4* variants**

Three intragenic *BRD4* variants were validated by Sanger sequencing, which confirmed that they had occurred as *de novo* events in each of the affected individuals. Sequence accession number NC\_000019.10 was used as reference. Variant nomenclature is based on *BRD4* transcript NM\_058243.2.

|       |      |                                                              |      |
|-------|------|--------------------------------------------------------------|------|
| Human | 1    | MSAESGPGTRLRNLPVMDGLETSQMSTTQAQAQPQANAASTNPPPETSNPNKPKRQT    | 60   |
| Mouse | 1    | ..T.....                                                     | 60   |
| Human | 61   | NQLQYLLRVVLTWKKHGFQAWPFQQPVDAVKLNLPDYKIIKTPMDMGTIKKRLNNYYW   | 120  |
| Mouse | 61   | .....                                                        | 120  |
| Human | 121  | NAQECIQDFNTMFTNCYIYNKPGDDIVLMAEAELEKLFQKINELPTEETEIMIVQAKGRG | 180  |
| Mouse | 121  | .....                                                        | 180  |
| Human | 181  | RGRKETGTAKPGVSTVPNTTQASTPPQTQTPQPNPPVQATPHPPFAVTPDLIVQTPVM   | 239  |
| Mouse | 181  | .....A.....S.....Q.....E.....T.....A.P...                    | 240  |
| Human | 240  | TVVPPQLQTPPPVPPQPPFAPAPQVQSHPPIIAATPQPVKTKKGVKRRADTTTPTT     | 299  |
| Mouse | 241  | .M.....S.....P.....V.....T.....                              | 300  |
| Human | 300  | IDPIHEPPSLPPEPKTTKLGQRRESSRPVKKKDVDPDSQQHPAPEKSSKVSQKCCSG    | 359  |
| Mouse | 301  | .....A.....A.....P.....G.....I.....                          | 360  |
| Human | 360  | ILKEMFAKHAAYAWPFYKPVDEALGLHDYCDIIKHPMDSTIKSKLEAREYRDAQEFG    | 419  |
| Mouse | 361  | .....S.....                                                  | 420  |
| Human | 420  | ADVRLMFSNCYKNPPDHEVVAMARKLQDVFEMRFKMPDEPEEPVAVSSPAVPPPTKV    | 479  |
| Mouse | 421  | .....T.....                                                  | 480  |
| Human | 480  | VAPSSSSDSSDSSDSSDSSDSEERAQRLAELQEQLKAVHEQLAALSQPQNKPKKK      | 539  |
| Mouse | 481  | .....                                                        | 540  |
| Human | 540  | EKDKEKKEKHKRKEEVEENKSKAKEPPPKTKKNSSNSNVSKKEPAMKSKPPPTY       | 599  |
| Mouse | 541  | .....K.....T.....L.....V.T.T.....                            | 600  |
| Human | 600  | ESEEDKCKPMSYEEKRQLSLDINKLPGEKLRVVHIIQSREPSLKNNSPDEIEIDFETL   | 659  |
| Mouse | 601  | .....                                                        | 660  |
| Human | 660  | KPSTLRELERVYVTSCLRKKRKPQAEKVDVIAGSSKMGFSSSESSSSSSDSEDSET     | 719  |
| Mouse | 661  | .....T.....                                                  | 720  |
| Human | 720  | EMAPKSKKKGHPGREQKHHHHHQMQQAPAPVQPPPPPPPPPPPPPPPPPPPPPP       | 778  |
| Mouse | 721  | .....T.D.....P.P.....Q...                                    | 780  |
| Human | 779  | PPPPPSMFQQAAPAMKSSPPPIATQVPVLEPQLPGSVFDFIGHFTQPIHLHPQELPPH   | 838  |
| Mouse | 781  | .....T.....TA.....                                           | 840  |
| Human | 839  | LPQPPEHSTPHHLNQHAVVSPALHNALPQPSRPSNRAALPKPARPPAVSPALTQTP     | 898  |
| Mouse | 841  | .....T.....A.P.                                              | 900  |
| Human | 899  | LLPQPPMAQPPVLEDEEPPAPPLTSMQMQLYLQQLQKVQPPTPLLPVSVKVSQPPPL    | 958  |
| Mouse | 901  | .....                                                        | 960  |
| Human | 959  | PPPHPSVQQQ-LQQQPPPPPPPPPPPPPPPPPPPPPPPPPPPPPPPPPPPPPPPP      | 1017 |
| Mouse | 961  | .....Q.P.....PS.P..A.....P..                                 | 1020 |
| Human | 1018 | QPPHPPGQPPPPQPAKQQVIQHHHSRHHKSDPYSTGHLREAPSPLMIHSPQMSQFQ     | 1077 |
| Mouse | 1021 | ..T.....P.....A.....P...                                     | 1080 |
| Human | 1078 | SLTHQSPFQQNVQPKKQ-----ELRAASVVQP                             | 1104 |
| Mouse | 1081 | .....VKGRAEPQPPGPMGQGGCPCPASPAVPLMSQ...PP.....               | 1140 |
| Human | 1105 | QPLVVVKEEKIHSPIIRSEFPSPSLRPEPKHPESIKAPVHLPQRPKMPVDVGRPVIRP   | 1164 |
| Mouse | 1141 | .....T.....N.....I.....                                      | 1200 |
| Human | 1165 | PEQNAPPAPDKDKQKQEPKTPVAPKDKLKIKNMGSWASLVQKHPTTPSSSTAKSSDSF   | 1224 |
| Mouse | 1201 | ..S.....                                                     | 1260 |
| Human | 1225 | EQFRRAAREKEEREKALKAQAEHAEKEKERLRQERMRSREDEDALEQARRAHEEARRRQE | 1284 |
| Mouse | 1261 | .H.....                                                      | 1320 |
| Human | 1285 | QQQQQRQE--QQQQQQQAAVAAAATPQAQSSQPQSMQDQRELARKREQERRREAMA     | 1342 |
| Mouse | 1321 | .....Q.QRQE.....SA.....                                      | 1380 |
| Human | 1343 | ATIDMNFQSDLLSIFEENLF                                         | 1362 |
| Mouse | 1381 | .....                                                        | 1400 |

## Supplementary Figure 6

### Protein sequence alignment of human versus mouse BRD4

The position of the human p.Tyr430, equivalent to mouse p.Tyr431 is indicated by a red arrow. The presence of an N-terminus proline residue in the mouse sequence (p.Pro218) (red box) results in a shift of one amino acid. Dots denote BRD4 amino acid residues which are identical between human and mouse. Sequence alignment was performed with NCBI BLAST, using sequence accession numbers NP\_490597.1 (human) and NP\_065254.3 (mouse). For simplicity, and in line with the human data, the mouse p.Tyr431Cys is referred to as *Brd4*<sup>Y430C</sup> throughout both the main text and the supplementary text and methods.

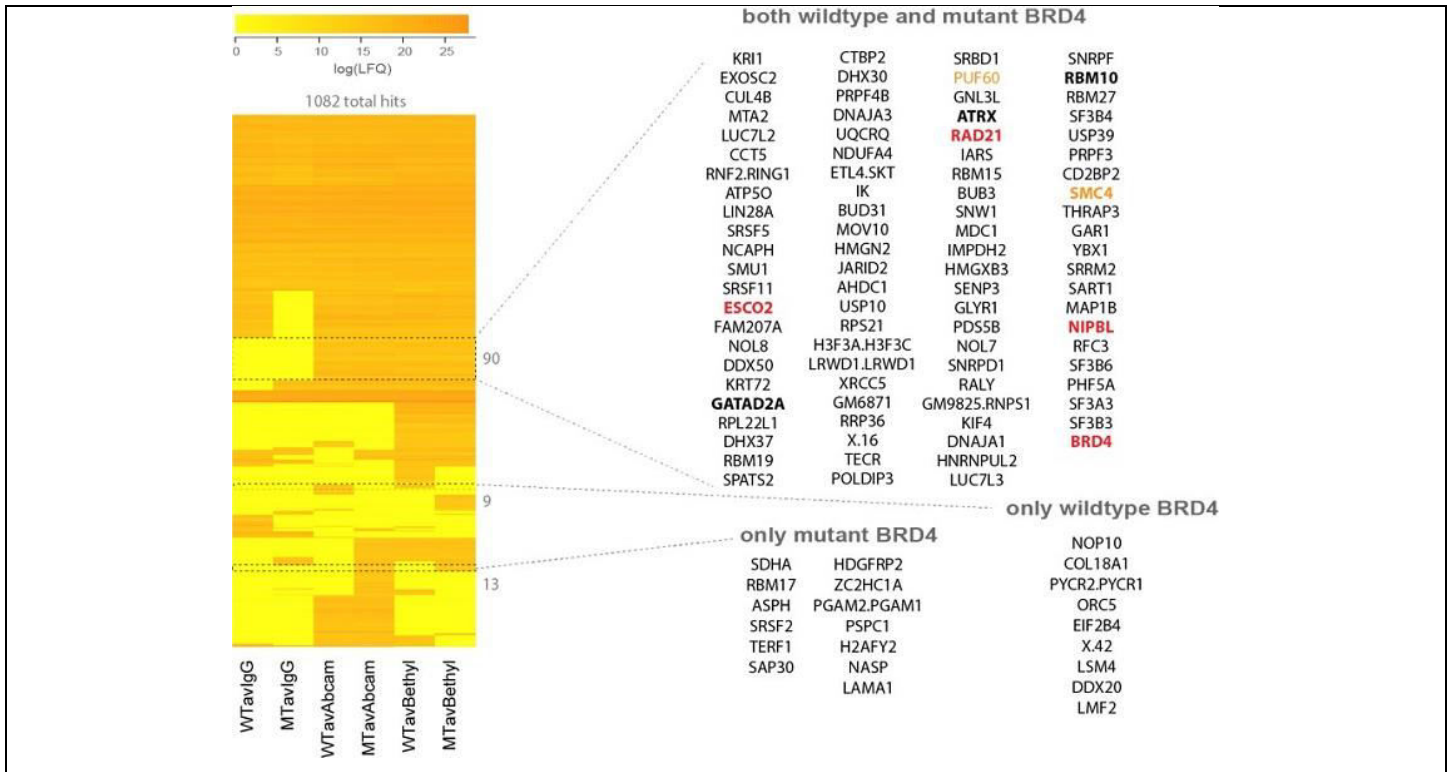

### Supplementary Figure 7

#### High confidence potential BRD4-interacting proteins indicated in Figure 2C&D

Heatmap of the label-free mass spectrometry quantitative output values (average of triplicates) assigned to each protein following immunoprecipitation from wild-type (WT) and *Brd4*<sup>Y430C/Y430C</sup> (MT) mESCs using IgG only control or Abcam/Bethyl antibody against BRD4. Proteins that interact with both wildtype and mutant BRD4 (top), wildtype BRD4 only (middle) and mutant BRD4 only (bottom) are indicated by dotted lines and named. Proteins known to be mutated in human cohesinopathies are shown in red, proteins known to be mutated in neurodevelopmental disorders are shown in bold, and those plausibly involved in neurodevelopmental disorders are shown in yellow. Full list of peptide hits available in Supplementary Table 4.



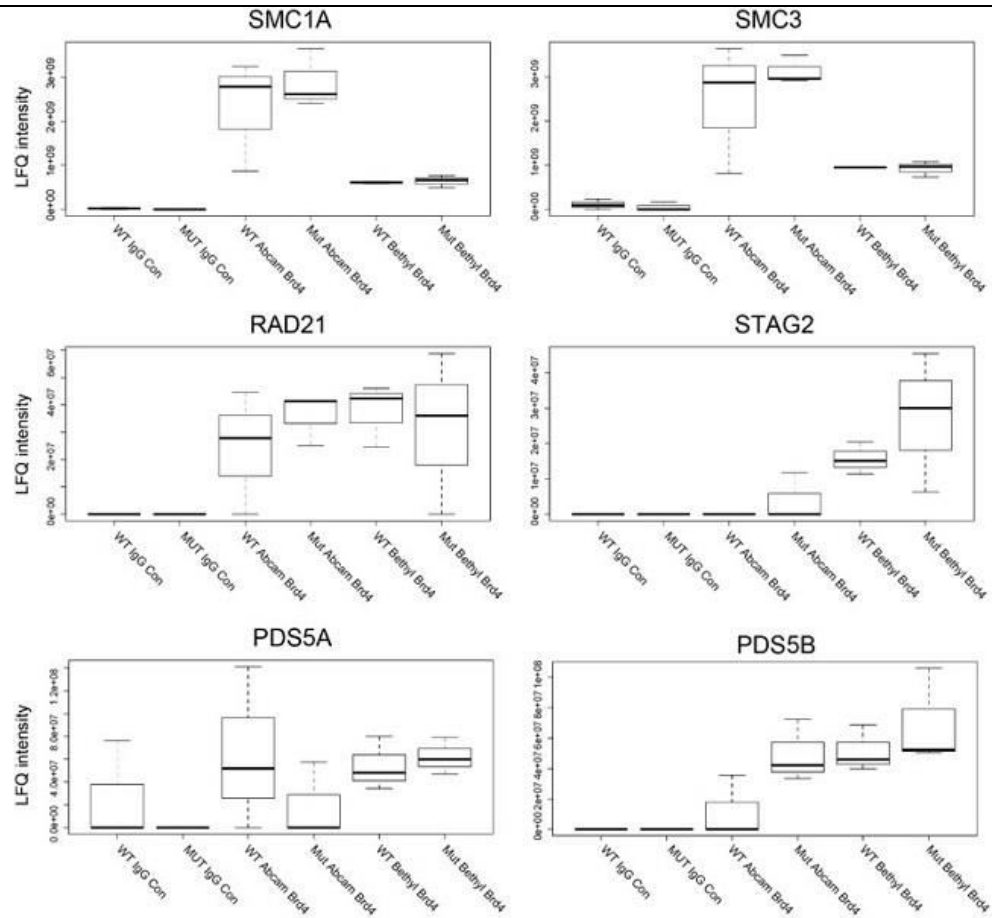

**Supplementary Figure 8**

**Box plots showing details of the mass spectrometry results for members of the cohesin complex**

The y-axis represents the label-free quantification (LFQ) intensity and the x-axis the reagent used for the immunoprecipitation in wild-type (WT) and *Brd4*<sup>Y430C/Y430C</sup> (MUT) mESCs. Full list of peptide hits available in Supplementary Table 4.

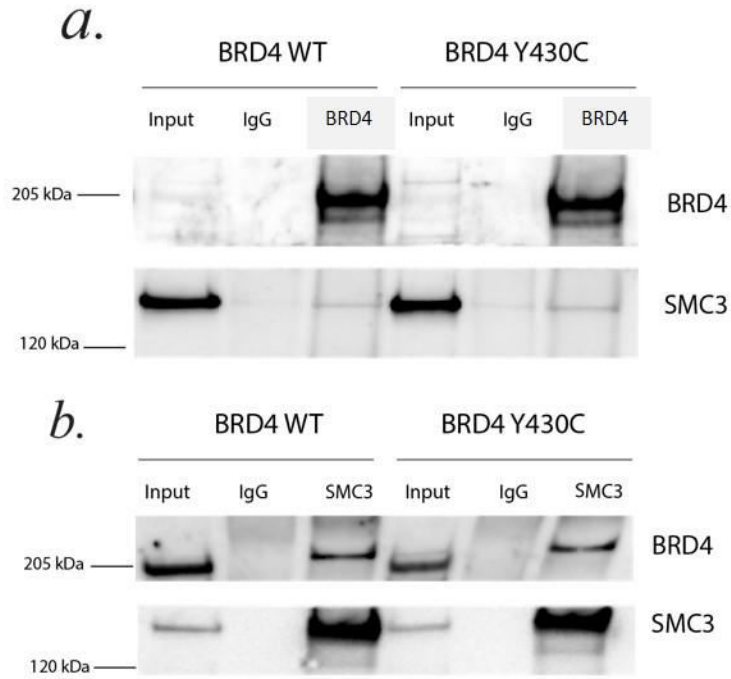

**Supplementary Figure 9**

**Reciprocal immunoprecipitations (IPs) of BRD4 and SMC3 in wild-type and *Brd4*<sup>Y430C/Y430C</sup> mouse embryonic stem cells**

Cropped immunoblots of endogenous BRD4 (a) and SMC3 (b) IPs from wild-type (BRD4 WT) and *Brd4*<sup>Y430C/Y430C</sup> (BRD4 Y430C) mESCs. Normal rabbit IgG is used as a control. Input =1% of mESC nuclear extract. Antibodies detect BRD4 and SMC3

*Brd4* c.1292A>G p.(Tyr431Cys)

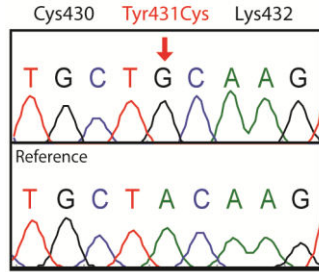

*Brd4* c.1288\_1302del p.(Cys430\_Asn434del)

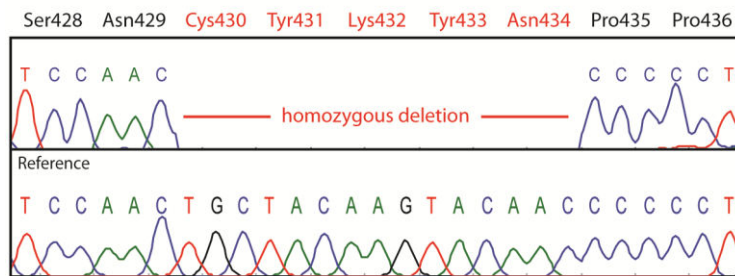

### Supplementary Figure 10

#### Representative chromatograms showing validation of genome editing in mouse embryos

Representative chromatograms showing validation of the homozygous *Brd4* knock-in c.1292A>G, p.(Tyr431Cys)<sup>\*</sup> and the homozygous *Brd4* in-frame deletion c.1288\_1302del, p.(Cys430\_Asn434del) mice using genomic DNA extracted from mouse embryos. The mutated amino acid residues are shown in red. The mouse *Brd4* sequence accession number NC\_000083.6 was used as reference. Variant nomenclature is based on mouse *Brd4* transcript NM\_020508.4. <sup>\*</sup> Mouse *Brd4* p.Tyr431Cys is equivalent to the human p.Tyr430Cys (see supplementary figure 6). For simplicity, this variant is referred to as Y430C throughout.

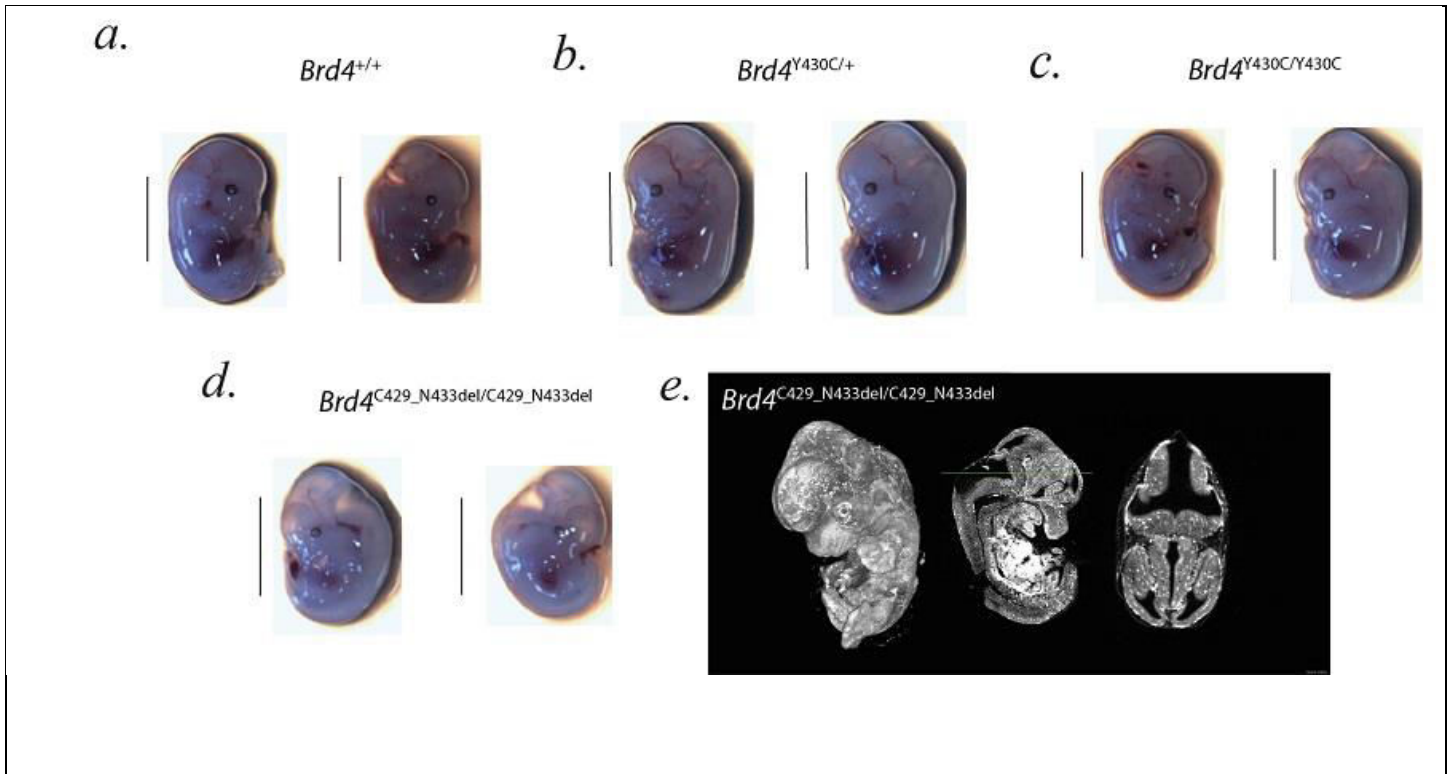

**Supplementary Figure 11**

**Images of wild-type and *Brd4* mutant mouse embryos**

Representative images of wild-type embryos (a), heterozygous and homozygous knock-in of mutant repair template resulting in  $Brd4^{Y430C/+}$  and  $Brd4^{Y430C/Y430C}$  embryos respectively (b & c), and (d)  $Brd4^{C429\_N433del/C429\_N433del}$  homozygous in-frame deletion embryos. e. Panel showing optical projection tomography of  $Brd4^{C429\_N433del/C429\_N433del}$  F0 mouse embryo. On the left of the panel is a 3D reconstruction of the whole embryo, in the middle is a sagittal section showing the position of the transverse section of the brain in the right panel. No morphological anomaly was detected other than being small for gestational age.

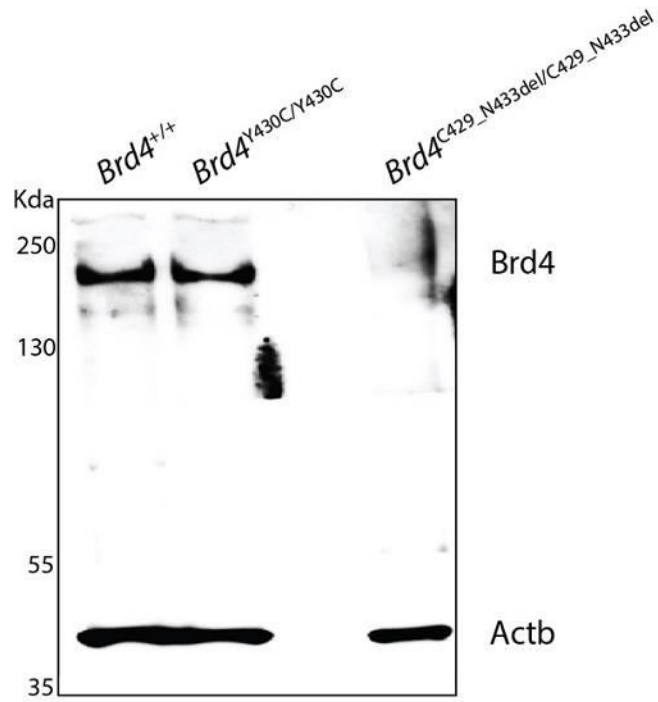

**Supplementary Figure 12**

**Immunoblot of cell lysate from WT, Y430C mutant and BRD4 deletion MEFs**

Immunoblot of cell lysate from wild-type (*Brd4*<sup>+/+</sup>), *Brd4*<sup>Y430C/Y430C</sup>, and BRD4 deletion (*Brd4*<sup>C429\_N433del/C429\_N433del</sup>) MEFs. Antibodies detect BRD4 and ACTB (loading control).

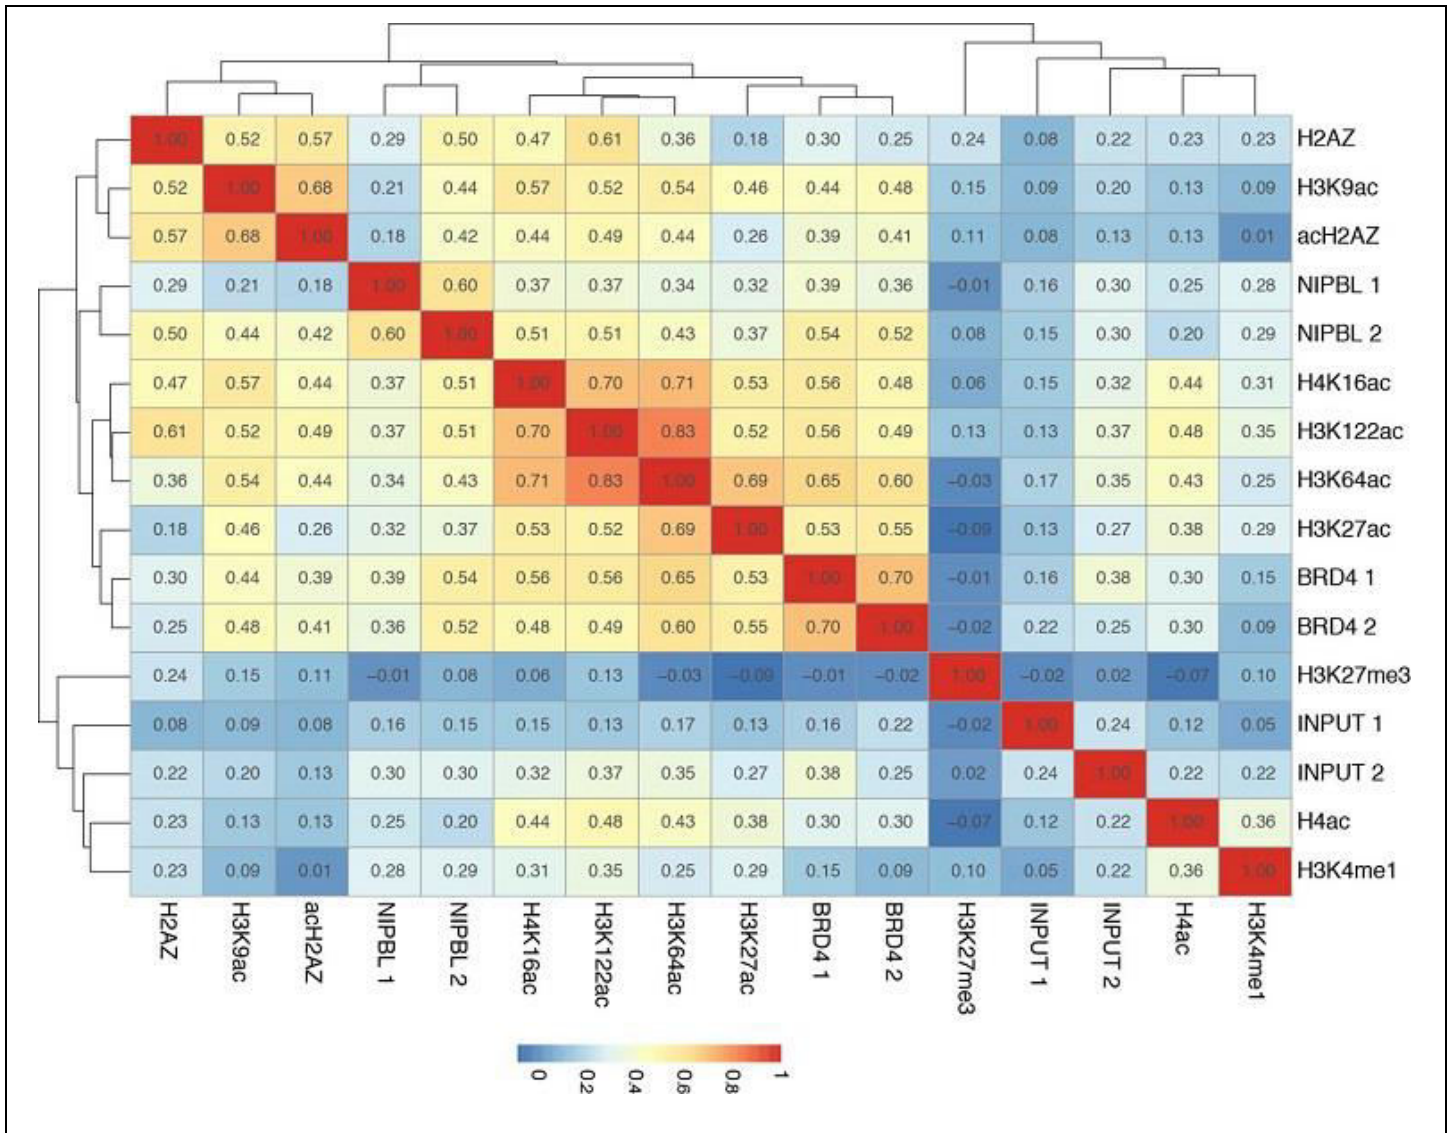

Supplementary Figure 13

Clustered heatmap of genome-wide ChIP-seq binding profiles from mouse embryonic stem cells.

Heatmap was generated using pairwise Pearson's r correlations. The antibodies that were used for the ChIP are indicated on the right and bottom of the heatmap. The accession numbers for each of the datasets is given in Supplementary Table 3

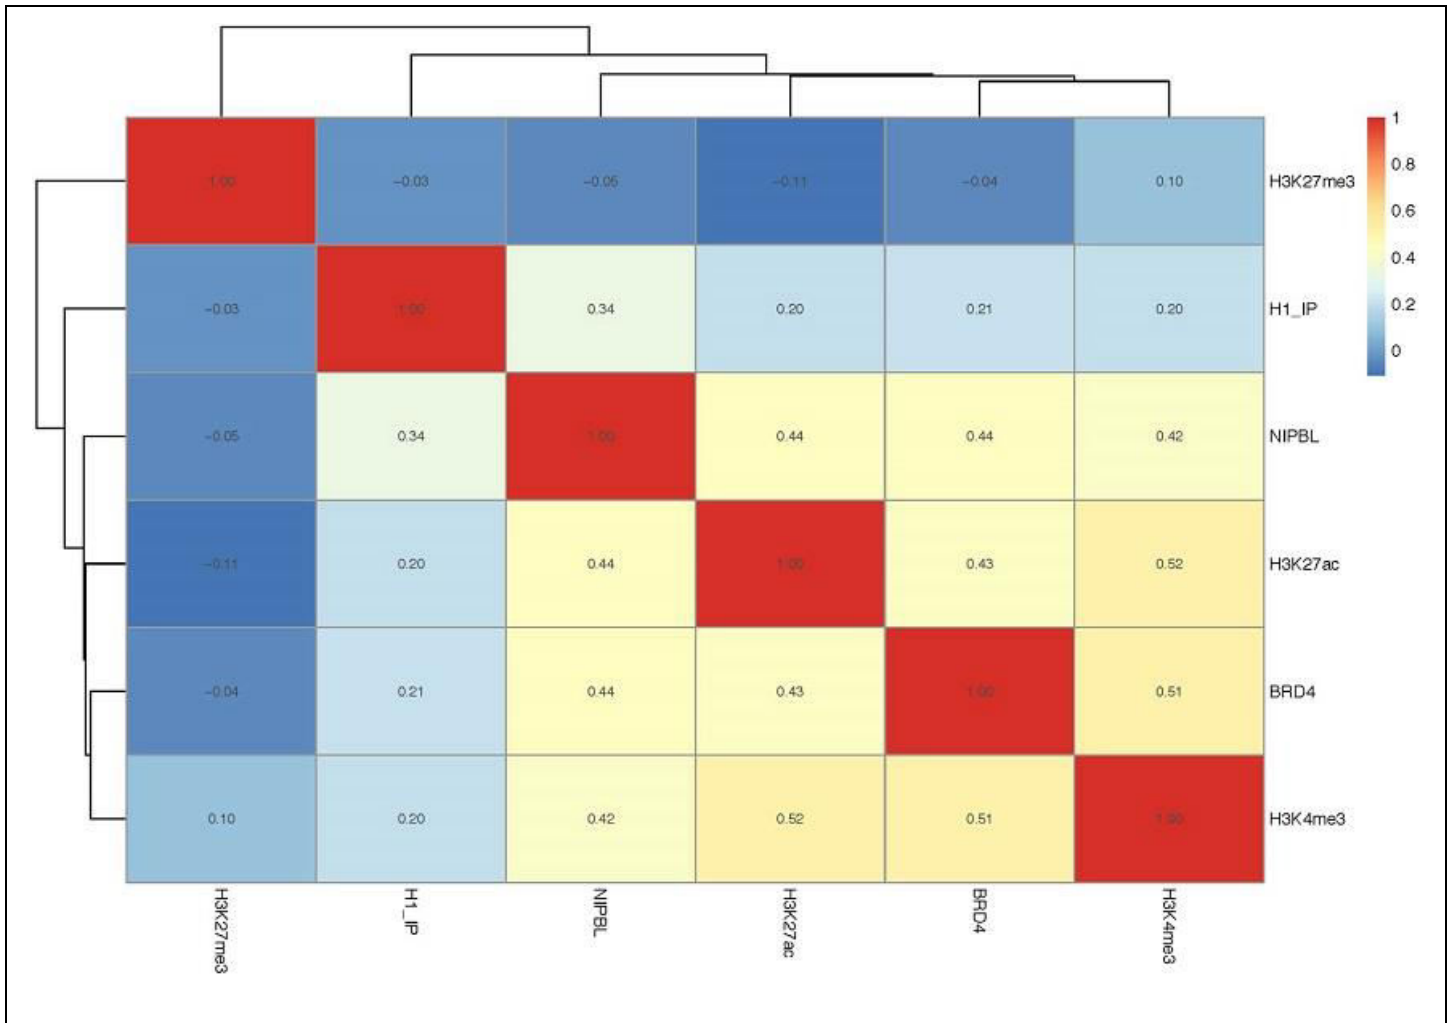

**Supplementary Figure 14**

**Clustered heatmap of genome-wide ChIP-seq binding profiles from human embryonic stem cells**

Heatmap was generated using pairwise Pearson's r correlations. The antibodies that were used for the ChIP are indicated on the right and bottom of the heatmap. The accession numbers for each of the datasets is given in Supplementary Table 3

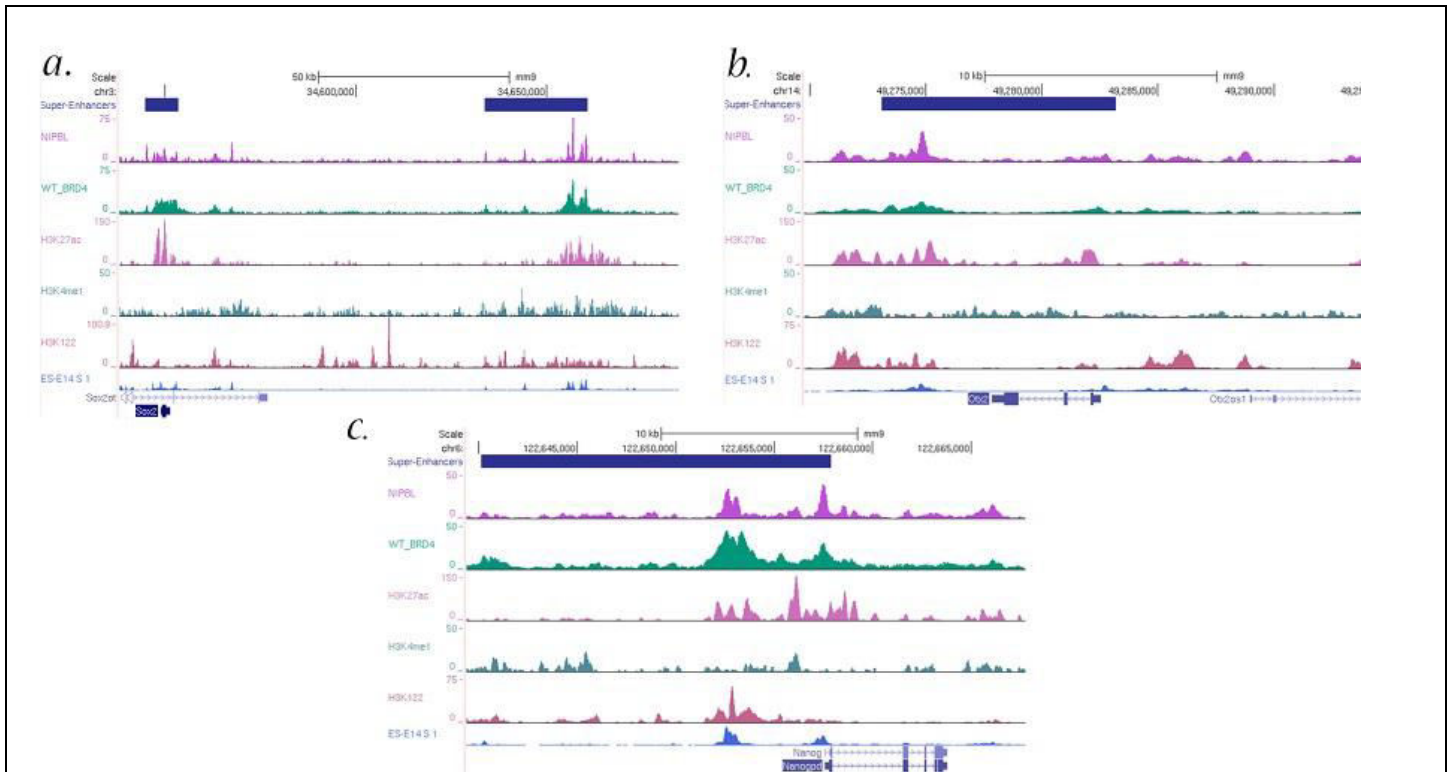

**Supplementary Figure 15**

**Screenshots of UCSC Genome Browser showing colocalisation of BRD4 and NIPBL ChIP-seq peaks over super enhancers**

BRD4 and NIPBL ChIP-seq peaks over the super enhancers of *Sox2* (a) *Otx2* (b) and *Nanog* (c). BRD4 ChIP-seq was carried out as described. Other tracks use previously published data: H3K27ac (GSM594578\_1/GSE24164), H3K4me1 (GSM594577\_1/ GSE24164); H3K122ac, GSM2054689/GSE66023); blue bars show mESC super-enhancers.



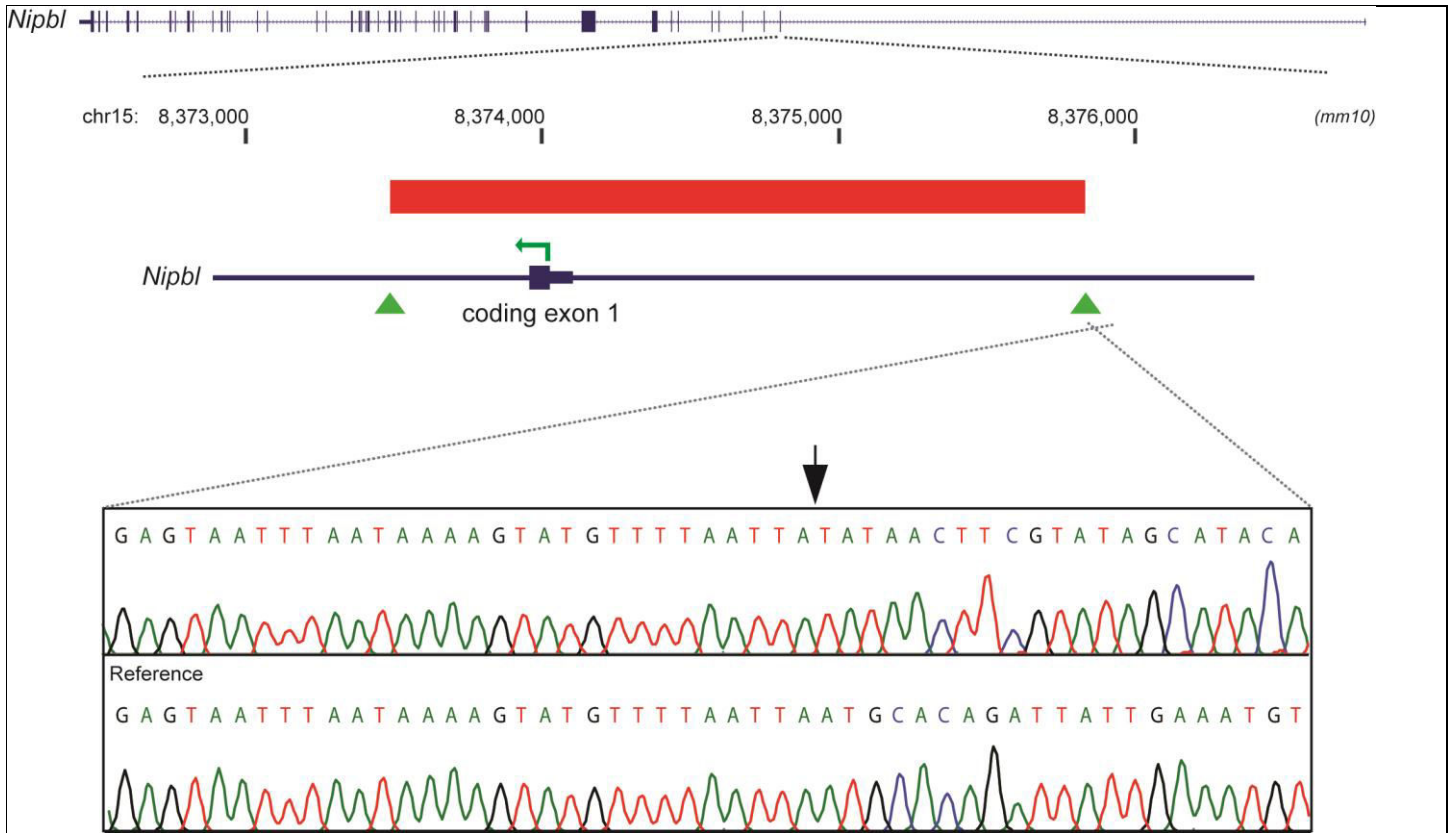

**Supplementary Figure 16**

**Schematic representation of the deleted region in *Nipbl* gene in mice with heterozygous LOF of *Nipbl***

Location of the deleted region is shown as red block. Green triangles mark the boundary of deletion based on the mouse genome reference assembly mm10 (chr15: 8,373,580-8,375,641). Representative chromatogram with nucleotide bases after the breakpoint is marked by black arrow.

## Differentially Expressed Genes

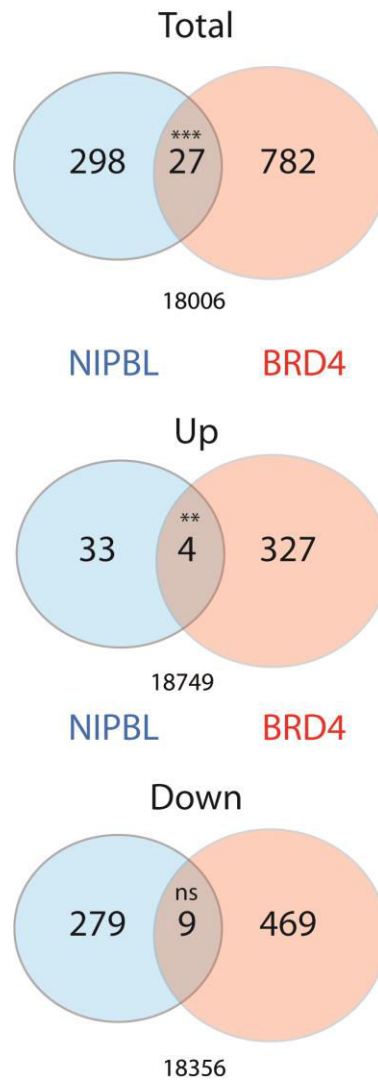

### Supplementary Figure 17

#### Venn diagrams showing overlaps between differentially expressed (DE) genes

Venn diagrams showing overlaps between differentially expressed (DE) genes from *Brd4*<sup>Y430C/Y430C</sup> MEFs compared to *Nipbl* heterozygous null MEFs. The total number of genes stays the same in each comparison (19,113). A hypergeometric test was performed on the intersection of the DE genes to determine if DE genes were significantly enriched. *P*-values \*\*\*0.00069; \*\* 0.0037; ns 0.295

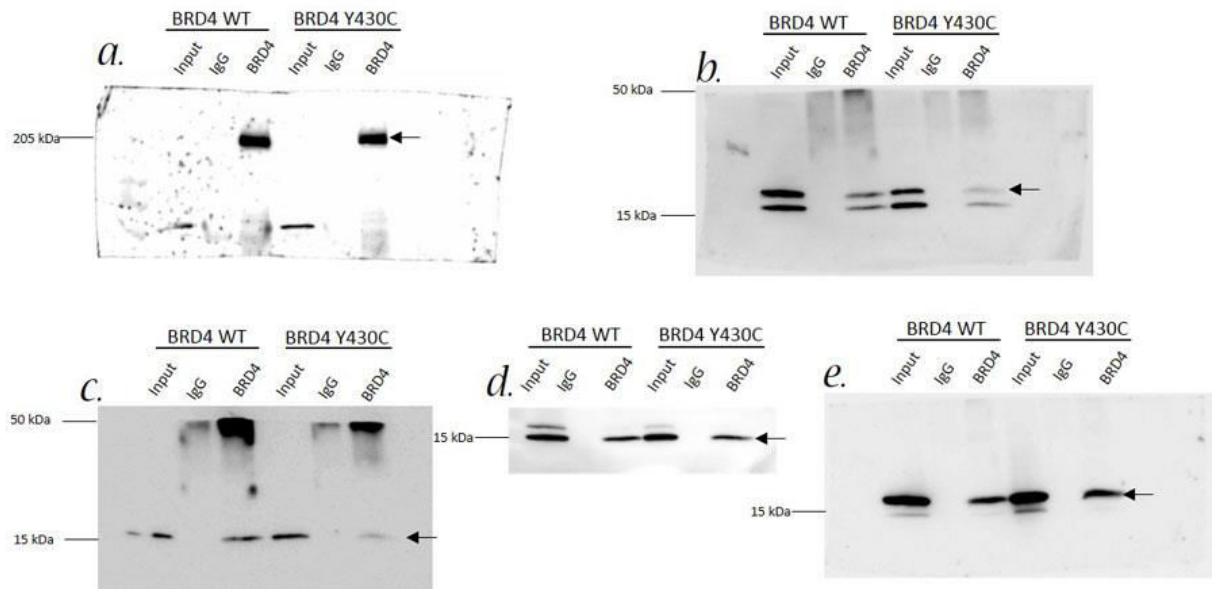

**Supplementary Figure 18**

**Uncropped immunoblot images corresponding to figure 2b**

Images show endogenous BRD4 and rabbit normal IgG IPs from wild-type (BRD4 WT) and *Brd4*<sup>Y430C/Y430C</sup> (BRD4 Y430C) mESCs, with antibodies detecting BRD4 (a), H3K9ac (b), H3K27ac (c), H4K8ac (d), H3 (e). Arrow head identifies band of correct size.

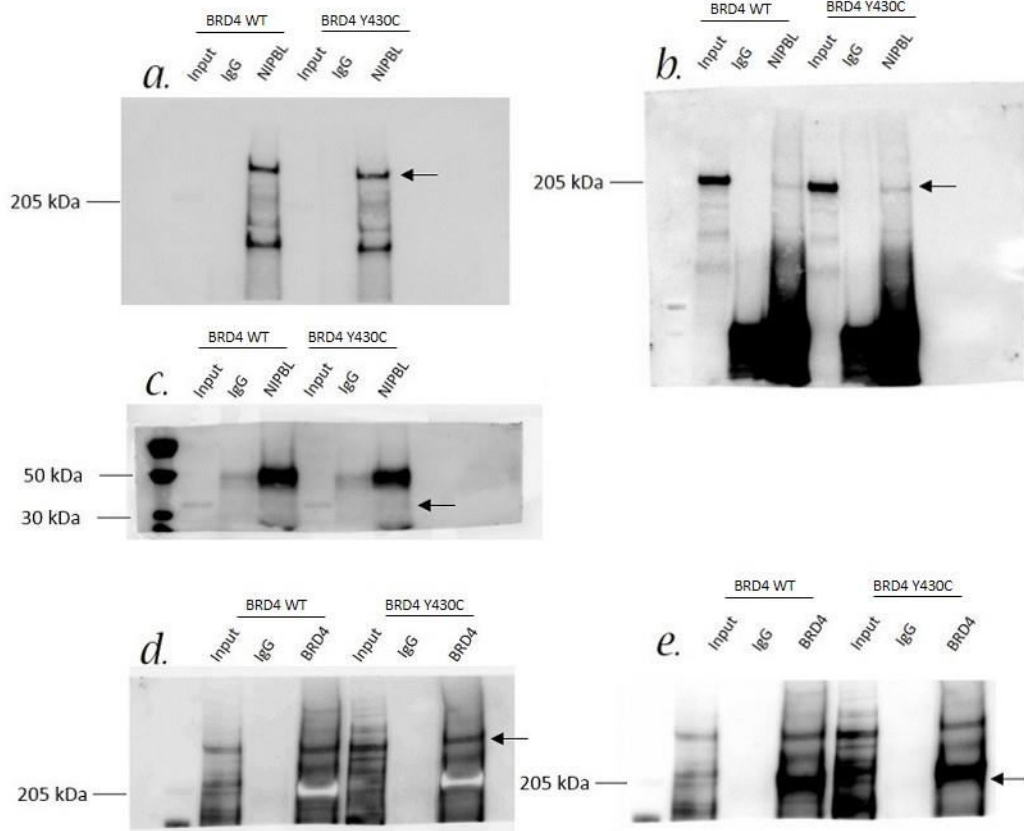

**Supplementary Figure 19**

**Uncropped immunoblot images corresponding to figure 2e**

Images a-c show endogenous NIPBL and rabbit normal IgG IPs from wild-type (BRD4 WT) and *Brd4*<sup>Y430C/Y430C</sup> (BRD4 Y430C) mESCs, with antibodies detecting NIPBL (a), BRD4 (b), SOX2 (c). Images d&e show endogenous BRD4 and rabbit normal IgG IPs from *Brd4* wild-type and *Brd4*<sup>Y430C/Y430C</sup> mESCs, with antibodies detecting NIPBL (d), BRD4 (e). Arrow head identifies band of correct size.

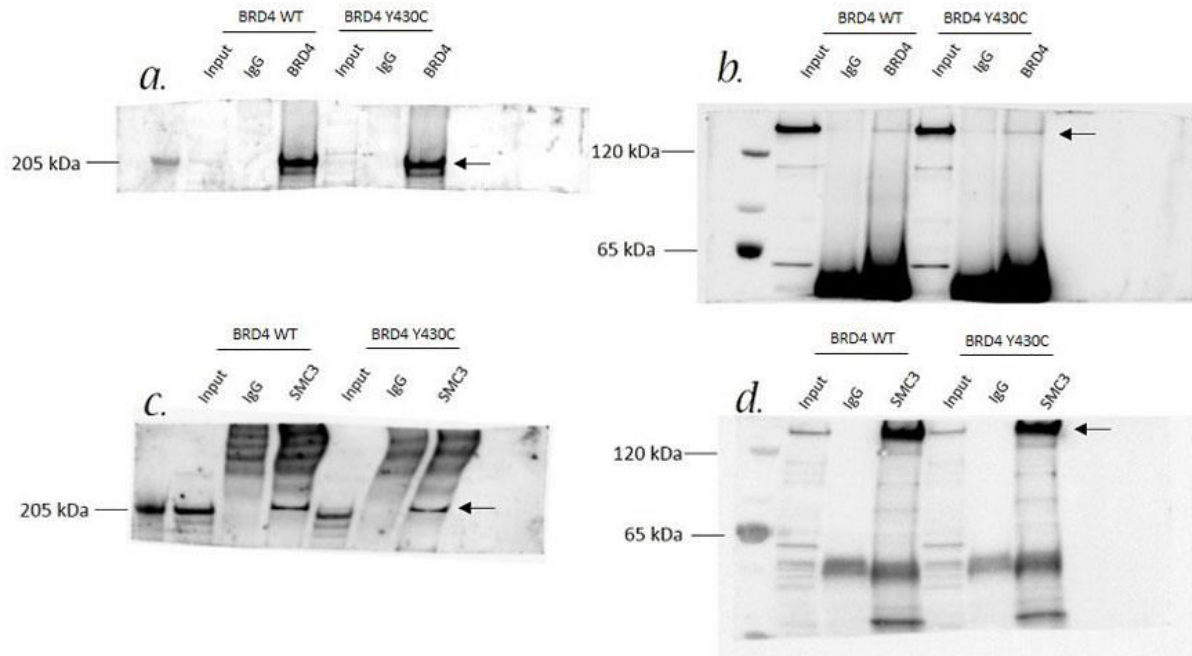

**Supplementary Figure 20**

**Uncropped immunoblot images corresponding to supplementary figure 9**

Images a&b show endogenous BRD4 and rabbit normal IgG IPs from wild-type (BRD4 WT) and *Brd4*<sup>Y430C/Y430C</sup> (BRD4 Y430C) mESCs, with antibodies detecting BRD4 (a), SMC3 (b). Images c&d show endogenous SMC3 and rabbit normal IgG IPs from *Brd4* wild-type and *Brd4*<sup>Y430C/Y430C</sup> mESCs, with antibodies detecting BRD4 (c), SMC3 (d). Arrow head identifies band of correct size.

| Patient/Study info                            | Present study 1                                                                         | Present study 2                                                                 | Present study 3                      | Present study 4                                                       | Published Patient 1                                                                                                                 | Published Patient 2                                                                                        | Published Patient 3                                                                             | Published Patient 4                                       | Published Patient 5                                        | Published Patient 6                                    | Published Patient 7                                                    | Summary /Total |
|-----------------------------------------------|-----------------------------------------------------------------------------------------|---------------------------------------------------------------------------------|--------------------------------------|-----------------------------------------------------------------------|-------------------------------------------------------------------------------------------------------------------------------------|------------------------------------------------------------------------------------------------------------|-------------------------------------------------------------------------------------------------|-----------------------------------------------------------|------------------------------------------------------------|--------------------------------------------------------|------------------------------------------------------------------------|----------------|
| PMD                                           | NA                                                                                      | NA                                                                              | NA                                   | NA                                                                    | 17339581<br>20648052                                                                                                                | 19215039                                                                                                   | 20648052                                                                                        | 20570643                                                  | 21994138                                                   | 22750323                                               | 21815246                                                               |                |
| DECIPHER ID                                   | 281165                                                                                  | NA                                                                              | NA                                   | 264293                                                                |                                                                                                                                     |                                                                                                            |                                                                                                 | 255743                                                    |                                                            | 255839?                                                |                                                                        |                |
| Patient ID                                    | 4198                                                                                    | 3049                                                                            | CDL038                               | 264293                                                                | 11/03 and patient 2                                                                                                                 |                                                                                                            | patient 1                                                                                       |                                                           |                                                            |                                                        |                                                                        |                |
| Country                                       | UK                                                                                      | UK                                                                              | UK                                   | UK                                                                    | Germany                                                                                                                             | US                                                                                                         | Italy                                                                                           | Belgium                                                   | US                                                         | Denmark                                                | Japan                                                                  |                |
| DNA mutation/deletion                         | 1.04 Mb deletion at 19p13.12                                                            | c.1289A>G; p.Tyr430Cys                                                          | c.1224delinsCA p.Glu408Aspfs*4       | c.691del; p.Asp231Thrfs*9                                             | ~2 Mb deletion at 19p13.12                                                                                                          | 2.52 Mb deletion at 19p13.12                                                                               | 1.9 Mb deletion at 19p13.12                                                                     | 1.2 Mb deletion at 19p13.12                               | 2.53 Mb deletion at 19p13.11                               | 1.4 Mb deletion at 19p13.1                             | 763 kb deletion at 19p13.12                                            |                |
| hg19                                          | chr19:14503000-15543000                                                                 | chr19; g.15374283T>C                                                            | chr19; g.15374348delinsTG            | chr19; g.15376323del                                                  | chr19:14141667-15965683                                                                                                             | chr19:14069000-16499000                                                                                    | chr19:14269000-16189000                                                                         | chr19:14382780-15492848                                   | chr19:13899000-16519000                                    | chr19:15178837-16628694                                | chr19:15439338-16203271                                                |                |
| de novo                                       | yes                                                                                     | yes                                                                             | yes                                  | yes                                                                   | unknown                                                                                                                             | yes                                                                                                        | unknown                                                                                         | unknown                                                   | yes                                                        | yes                                                    | yes                                                                    |                |
| Sex                                           | F                                                                                       | F                                                                               | F                                    | M                                                                     | F                                                                                                                                   | F                                                                                                          | M                                                                                               | M                                                         | F                                                          | M                                                      | F                                                                      | 7:4            |
| Gestational age (wks)                         | 42                                                                                      | 36                                                                              | 40                                   | 38                                                                    | 32                                                                                                                                  | 40                                                                                                         | 36                                                                                              | 40                                                        | 36                                                         | 41                                                     | 40                                                                     |                |
| Birth weight (g)                              | 3515                                                                                    | 2041                                                                            | 2410                                 |                                                                       |                                                                                                                                     | 2130                                                                                                       | 2400                                                                                            | 2200                                                      | 1670                                                       | 2450                                                   | 2588                                                                   |                |
| Birth weight (Z score)                        | -0.18                                                                                   | -1.42                                                                           | -2.41                                | -0.8                                                                  |                                                                                                                                     | -3.18                                                                                                      | -0.82                                                                                           | -3.16                                                     | -2.34                                                      | -2.53                                                  | -1.94                                                                  | -1.88          |
| Length at birth (cm)                          |                                                                                         |                                                                                 |                                      |                                                                       |                                                                                                                                     |                                                                                                            |                                                                                                 | 46                                                        | 46                                                         | 51                                                     | 46.6                                                                   |                |
| Length (Z score)                              |                                                                                         |                                                                                 |                                      |                                                                       |                                                                                                                                     |                                                                                                            |                                                                                                 | -2.5                                                      | -1.5                                                       |                                                        | -1.94                                                                  | -1.98          |
| Birth OFC (cm)                                | 34                                                                                      |                                                                                 |                                      |                                                                       |                                                                                                                                     |                                                                                                            | 32                                                                                              | 32                                                        | 29                                                         |                                                        | 31.5                                                                   |                |
| Birth OFC (Z score)                           | -0.44                                                                                   |                                                                                 |                                      |                                                                       | -2.4                                                                                                                                |                                                                                                            | -1.5                                                                                            | -2.5                                                      | -3                                                         |                                                        | -2.47                                                                  | -1.65          |
| Age at evaluation                             | 6 yrs 3 mo                                                                              | 3yrs 1 mo                                                                       | 11yrs 1mo                            | 11.2 years                                                            | 8.5 yrs                                                                                                                             | 10 yrs                                                                                                     | 31 yrs                                                                                          | 15 yrs                                                    | died at 45 days                                            | 2 yrs 9 mo                                             | 5 yrs                                                                  |                |
| Weight (kg)                                   | 26.5                                                                                    | 12.4                                                                            | 37.06                                |                                                                       |                                                                                                                                     |                                                                                                            | 83                                                                                              |                                                           |                                                            |                                                        | 16.2                                                                   |                |
| Weight (Z-score)                              | 1.47                                                                                    | -1.28                                                                           | 0.1                                  | -0.71                                                                 |                                                                                                                                     |                                                                                                            | 1.11                                                                                            |                                                           |                                                            |                                                        | -0.95                                                                  | -0.04          |
| Height (cm)                                   | 115.9                                                                                   | 89.5                                                                            | 133.9                                |                                                                       |                                                                                                                                     |                                                                                                            | 150                                                                                             |                                                           |                                                            |                                                        | 105.6                                                                  |                |
| Height (Z-score)                              | -0.19                                                                                   | -1.55                                                                           | -1.5                                 | -1.94                                                                 |                                                                                                                                     |                                                                                                            | -2.2                                                                                            |                                                           |                                                            |                                                        | -0.73                                                                  | -1.35          |
| OFC (cm)                                      | 48                                                                                      | 45.3                                                                            | 49                                   |                                                                       |                                                                                                                                     |                                                                                                            | 53.5                                                                                            |                                                           |                                                            |                                                        | 47.8                                                                   |                |
| OFC (Zscore)                                  | -3.57                                                                                   | -4.24                                                                           | -3.9                                 | -1.48                                                                 | -3.2                                                                                                                                |                                                                                                            | -1.4                                                                                            |                                                           |                                                            | -3                                                     | -3.25                                                                  | -3.01          |
| Facial photographs available                  | no                                                                                      | yes                                                                             | yes                                  | yes                                                                   | no                                                                                                                                  | yes: 2yrs, 6yrs, 9yrs                                                                                      | yes                                                                                             | yes                                                       | no                                                         | yes                                                    | yes                                                                    |                |
| Relevant Facial Features                      | synophrys, arched eyebrows, short nose, long philtrum                                   | synophrys, arched eyebrows, short nose, long philtrum                           | synophrys, short nose, long philtrum |                                                                       | synophrys, long lashes, mild ptosis, flattened nasal bridge, anteverted nostrils, long philtrum and small mouth with thin upper lip | ptosis, short nose with anteverted nares, long philtrum, flattened vermilion border, and mild micrognathia | synophrys, long philtrum, thin upper lip, short nose                                            | synophrys, thick eyebrows, flat nasal bridge, high palate | Unknown                                                    | synophrys, hypotelorism, strabismus                    | arched eyebrows, depressed nasal bridge, short columella, micrognathia |                |
| CdLS Diagnostic Criteria Checklist Fulfilled? | No                                                                                      | Yes                                                                             | Yes                                  | No                                                                    | Yes                                                                                                                                 | Missing data                                                                                               | Yes                                                                                             | Borderline                                                | Missing data                                               | No                                                     | No                                                                     | 4/9            |
| Major Criteria                                | OFC; speech delay; ID; OCD                                                              | OFC; ID; DD; absent speech                                                      | OFC; DD;                             | DD                                                                    | IUGR; small OFC; ID; hyperactivity; absent speech                                                                                   | ID; DD; IUGR                                                                                               | ID; DD; delayed speech; self injury; autistic behaviour; anxiety; hyperactivity                 | OFC; IUGR; height; DD; speech delay; ID; anxiety; shy     | OFC; IUGR                                                  | IUGR; OFC; ID; DD; speech delay;                       | IUGR; OFC; height                                                      |                |
| Minor Criteria                                | short 1st metacarpals                                                                   | GERD; hip dysplasia; VSD                                                        | myopia; blocked tear ducts           | VSD                                                                   | Hearing loss; GERD; PDA                                                                                                             | Hearing loss; ASD/VSD                                                                                      | seizures; submucous cleft palate, II and III toe syndactyly; aortic regurgitation; hearing loss | Seizures; hypertrichosis;                                 | Gut malrotation; VSD; seizures; hearing loss               | II and III toe syndactyly; hearing loss; hypermetropia | Hearing loss                                                           |                |
| Other Relevant Clinical Features              | telecanthus; normal height, mild chiari I malformation                                  | None                                                                            |                                      | Cleft lip, inguinal hernia, posteriorly angulated ears, hypertelorism | Preauricular tag                                                                                                                    | Supernumerary nipples; thrombocytopenia                                                                    | precocious puberty, hypothyroidism, hyperlipidemia                                              | Narrow brain stem, thin corpus callosum, obesity          | pontine hypoplasia, thin corpus callosum, preauricular tag | thrombocytopenia; large central incisors               | preauricular tag; only mild ID                                         |                |
| Conclusion                                    | Diagnosis of atypical CdLS on basis of facial features, hands and developmental profile | Very typical facial appearance and head growth, relative preservation of height | Atypical CdLS                        | Unknown                                                               | Atypical CdLS                                                                                                                       | Facial appearance compatible with atypical CdLS: HDAC8-like                                                | Atypical CdLS                                                                                   | Possible atypical CdLS; KBG-like                          | Unknown                                                    | KBG-like; some features of CdLS                        | Primary microcephaly is the only significant overlap with CdLS         |                |

GERD; gastroesophageal reflux. PDA; patent ductus arteriosus. OFC; occipitofrontal circumference. ID; intellectual disability. DD; developmental delay. IUGR; intrauterine growth retardation. VSD; ventricular septal defect. ASD; atrial septal defect. OCD; obsessive-compulsive disorder. KBG syndrome (MIM 148050).

**Supplementary table 1: Clinical Features of individuals with genomic variants affecting BRD4**

| <b>Primers for droplet digital PCR</b> | <b>Forward (5'-3')</b>    | <b>Reverse (5'-3')</b> |
|----------------------------------------|---------------------------|------------------------|
|                                        | CCAGCCTAGTGCAGAAGCAT      | CTGTCGCTGGATGACTTGG    |
| <b>UPL probe</b>                       | CTCCTCCA                  |                        |
| <b>gRNAs for CRISPR</b>                | <b>gRNA1</b>              | <b>gRNA2</b>           |
|                                        | CAACCCCCCTGACCATGAAG      | AGCAGTTGGAGAACATCAAT   |
| <b>Primers for CHIP-qPCR</b>           | <b>Forward (5'-3')</b>    | <b>Reverse (5'-3')</b> |
| Klf4 SE chip                           | CACAATGCCAGCTATGCGAT      | TCCTGCCCAAATGTGAGGAT   |
| Myc SE chip                            | TCCTTGACTGCTTCTCCTGG      | AGACAGTAAAGGGCCACACA   |
| Hoxa11 Pro                             | AGCCCAATGATGGATTTTGA      | GAAGGGAGGCTGGAGAAATC   |
| Myc p                                  | CCTAGATAACTCATTTCGTTTCGTC | CCCTGCGTATATCAGTCACCG  |
| Myc 5'                                 | CCAGAAGCTTTCCAGCAAGC      | CAGCTCAGCCTTGCTTGCTC   |

**Supplementary table 2: Oligonucleotide sequences**

| Name                                                 | Source                                                                                                                                                                                                  | Accession                                                                                                                                                                                               | Genome build |
|------------------------------------------------------|---------------------------------------------------------------------------------------------------------------------------------------------------------------------------------------------------------|---------------------------------------------------------------------------------------------------------------------------------------------------------------------------------------------------------|--------------|
| BRD4                                                 | GEO                                                                                                                                                                                                     | GSE33281/GSM823382                                                                                                                                                                                      | hg19         |
| NIPBL                                                | GEO                                                                                                                                                                                                     | GSE64758/GSM1579363                                                                                                                                                                                     | hg19         |
| H3K27ac                                              | ENCODE                                                                                                                                                                                                  | ENCSR000ANP/ENCFF948TVI                                                                                                                                                                                 | hg19         |
| H3K4me3                                              | ENCODE                                                                                                                                                                                                  | ENCSR814XPE/ENCFF195GST                                                                                                                                                                                 | hg19         |
| H3K27me3                                             | GEO                                                                                                                                                                                                     | GSE35791/GSM874985                                                                                                                                                                                      | hg19         |
| H1_Input                                             | GEO                                                                                                                                                                                                     | GSE64758 /GSM1693959                                                                                                                                                                                    | hg19         |
| hg19 blacklist                                       | ENCODE                                                                                                                                                                                                  | ENCSR636HFF                                                                                                                                                                                             | hg19         |
| H1-hESC DNaseI HS Uniform Peaks from ENCODE/Analysis | ENCODE                                                                                                                                                                                                  | wgEncodeAvgDnaseUwdukeH1hesUniPk.narrowPeak                                                                                                                                                             | hg19         |
| NIPBL 1                                              | GEO                                                                                                                                                                                                     | GSE22557/GSM560349                                                                                                                                                                                      | mm9          |
| NIPBL 2                                              | GEO                                                                                                                                                                                                     | GSE22557/GSM560350                                                                                                                                                                                      | mm9          |
| H4ac                                                 | GEO                                                                                                                                                                                                     | GSE76760/GSM2037252                                                                                                                                                                                     | mm9          |
| H4K16ac                                              | GEO                                                                                                                                                                                                     | GSE47761/GSM1156617                                                                                                                                                                                     | mm9          |
| H3K27me3                                             | ENCODE                                                                                                                                                                                                  | ENCSR000CFN/ENCFF001KDT                                                                                                                                                                                 | mm9          |
| H3K9ac                                               | ENCODE                                                                                                                                                                                                  | ENCSR000CGS/ENCFF001KCZ                                                                                                                                                                                 | mm9          |
| H3K122ac                                             | GEO                                                                                                                                                                                                     | GSE66023/GSM2054689,GSM2054690                                                                                                                                                                          | mm9          |
| H3K64ac                                              | GEO                                                                                                                                                                                                     | GSE66023/GSM2054691, GSM2054692                                                                                                                                                                         | mm9          |
| acH2AZ                                               | GEO                                                                                                                                                                                                     | GSE34483/GSM849929                                                                                                                                                                                      | mm9          |
| H2AZ                                                 | GEO                                                                                                                                                                                                     | GSE34483/GSM849929                                                                                                                                                                                      | mm9          |
| H3K4me1                                              | ENCODE                                                                                                                                                                                                  | ENCSR000CBF/ENCFF001KDZ                                                                                                                                                                                 | mm9          |
| H3K27ac                                              | ENCODE                                                                                                                                                                                                  | ENCSR000CDE/ENCFF001KDH                                                                                                                                                                                 | mm9          |
| H3K4me1                                              | GEO                                                                                                                                                                                                     | GSE24164/GSM594577_1                                                                                                                                                                                    | mm9          |
| H3K27ac                                              | GEO                                                                                                                                                                                                     | GSE24164/GSM594578_1                                                                                                                                                                                    | mm9          |
| mm9 blacklist                                        | <a href="http://mitra.stanford.edu/kundaje/akundaje/release/blacklists/mm9-mouse/mm9-blacklist.bed.gz">http://mitra.stanford.edu/kundaje/akundaje/release/blacklists/mm9-mouse/mm9-blacklist.bed.gz</a> | <a href="http://mitra.stanford.edu/kundaje/akundaje/release/blacklists/mm9-mouse/mm9-blacklist.bed.gz">http://mitra.stanford.edu/kundaje/akundaje/release/blacklists/mm9-mouse/mm9-blacklist.bed.gz</a> | mm9          |

**Supplementary table 3: list of datasets used and their accession numbers**



## Supplementary Note

### Known disease genes in the deleted interval in individual II:1 (family 4198)

Three genes (*EMR2*, *NOTCH3*, *TERC*) within the deleted interval in individual II:1 (family 4198) have been implicated in human genetic diseases unrelated to CdLS. Monoallelic mutations in *ADGRE2* have been reported as a cause of vibratory urticarial (OMIM 125630). Monoallelic loss of function mutations in *TERC*, a telomerase RNA component, cause autosomal dyskeratosis congenita (OMIM 127550). This condition shows anticipation with telomere shortening becoming more severe with successive generations. Given that these deletions are *de novo*, it seems unlikely that *TERC* haploinsufficiency would cause a childhood onset of the disorder. Heterozygous loss-of-function mutations in *NOTCH3* cause an adult onset neurological disorder Cerebral Autosomal Dominant Arteriopathy with Subcortical Infarcts and Leukoencephalopathy (CADASIL) Type 1.

### Reported p.His304Tyr Variant in *BRD4*

A non-synonymous variant in *BRD4* (c.910C>T, p.His304Tyr) has recently been reported in a single small family with congenital cataracts, macrocephaly, brachydactyly and mild short stature<sup>1</sup>. This variant was identified as one of five co-segregating rare variants identified. The *BRD4* variant was scored as possibly damaging using PolyPhen2 and was unique, although p.His304Pro has been identified once in gnomAD database. This is an interesting observation but we consider the human genetics evidence for association of the variant to the disease (appropriate segregation in three affected and one unaffected individual) to be limited.

### URLs

gnomAD database; <http://gnomad.broadinstitute.org>

## References

1. Jin, H.S. *et al.*, *PLoS One*. **12**, e0169226 (2017)

## Consortia: member list

### Deciphering Developmental Disorders (DDD) Study

#### Contributing Members and Affiliations

1. *Wellcome Trust Sanger Institute, Wellcome Trust Genome Campus, Hinxton, Cambridge CB10 1SA, UK*
  - Jeremy F. McRae
  - Stephen Clayton
  - Tomas W. Fitzgerald
  - Joanna Kaplanis
  - Elena Prigmore
  - Diana Rajan
  - Alejandro Sifrim
  - Nadia Akawi
  - Kirsty Ambridge
  - Daniel M. Barrett
  - Tanya Bayzetinova
  - Philip Jones
  - Wendy D. Jones
  - Daniel King
  - Netravathi Krishnappa
  - Laura E. Mason
  - Tarjinder Singh
  - Adrian R. Tivey
  - Jana Awada
  - A. Paul Bevan
  - Simon Brent
  - Elena Chatzimichali
  - Irina Colgiu
  - Dylan de Vries
  - Emma Gray
  - Susan Gribble
  - Liu He
  - Lucy Hildyard
  - Ben Hutton
  - Rosemary Kelsell
  - Anna Middleton
  - Daniel Perrett
  - Martin Pollard

- Raheleh Rahbari
  - Josh Randall
  - Ganesh Jawahar Swaminathan
  - Parthiban Vijayarangakannan
  - Sara Widaa
  - Emily Wilkinson
  - Helen V. Firth
  - Caroline F. Wright
  - David R. FitzPatrick
  - Jeffrey C. Barrett
  - Matthew E. Hurles
2. *MRC Human Genetics Unit, MRC IGMM, University of Edinburgh, Western General Hospital, Edinburgh EH4 2XU, UK*
- Stuart Aitken
  - Philip Greene
  - Andrew Jackson
  - Wayne Lam
  - Anne Lampe
  - Eddy Maher
  - David Moore
  - David R. FitzPatrick
3. *Department of Engineering Science, University of Oxford, Parks Road, Oxford OX1 3PJ, UK*
- Mohsan Alvi
4. *Wessex Clinical Genetics Service, University Hospital Southampton, Princess Anne Hospital, Coxford Road, Southampton SO16 5YA, UK*
- Munaza Ahmed
  - Diana Baralle
  - David J. Bunyan
  - Amanda Collins
  - Morag N. Collinson
  - Nicola Foulds
  - Lucy Harrison
  - Victoria Harrison
  - Katherine Lachlan
  - I. Karen Temple
  - Audrey Torokwa
  - Diana Wellesley
5. *Wessex Regional Genetics Laboratory, Salisbury NHS Foundation Trust, Salisbury District Hospital, Odstock Road, Salisbury, Wiltshire SP2 8BJ, UK*
- Munaza Ahmed
  - Diana Baralle
  - David J. Bunyan
  - Amanda Collins

- Morag N. Collinson
  - Nicola Foulds
  - Lucy Harrison
  - Victoria Harrison
  - Katherine Lachlan
  - I. Karen Temple
  - Audrey Torokwa
  - Diana Wellesley
6. *Faculty of Medicine, University of Southampton, Building 85, Life Sciences Building, Highfield Campus, Southampton SO17 1BJ, UK*
- Munaza Ahmed
  - Diana Baralle
  - David J. Bunyan
  - Amanda Collins
  - Morag N. Collinson
  - Nicola Foulds
  - Lucy Harrison
  - Victoria Harrison
  - Katherine Lachlan
  - I. Karen Temple
  - Audrey Torokwa
  - Diana Wellesley
7. *South West Thames Regional Genetics Centre, St George's Healthcare NHS Trust, St George's, University of London, Cranmer Terrace, London SW17 0RE, UK*
- Uruj Anjum
  - Frances Elmslie
  - Tessa Homfray
  - Sahar Mansour
  - Karen Marks
  - Meriel McEntagart
  - Anand Saggar
  - Kate Tatton-Brown
  - Rohan Taylor
8. *Institute of Medical Genetics, University Hospital of Wales, Heath Park, Cardiff CF14 4XW, UK*
- Hayley Archer
  - Angus Clarke
  - Sally Davies
  - Karenza Evans
  - Andrew Fry
  - Dhavendra Kumar
  - Sian Morgan
  - Hood Mugalaasi
  - Annie Procter

- Julian Sampson
- Vinod Varghese

9. *Department of Clinical Genetics, Block 12, Glan Clwyd Hospital, Rhyl, Denbighshire LL18 5UJ, UK*

- Hayley Archer
- Angus Clarke
- Sally Davies
- Karenza Evans
- Andrew Fry
- Dhavendra Kumar
- Sian Morgan
- Hood Mugalaasi
- Annie Procter
- Julian Sampson
- Vinod Varghese

10. *East Anglian Medical Genetics Service, Box 134, Cambridge University Hospitals NHS Foundation Trust, Cambridge Biomedical Campus, Cambridge CB2 0QQ, UK*

- Ruth Armstrong
- Simon Holden
- Sarju Mehta
- Soo-Mi Park
- Joan Paterson
- Lucy Raymond
- Jonathan Roberts
- Richard Sandford
- Ingrid Simonic
- Marc Tischkowitz
- Becky Treacy
- Sarah Wallwark
- Sarah Wilcox
- Geoff Woods
- Helen V. Firth

11. *Sheffield Regional Genetics Services, Sheffield Children's NHS Trust, Western Bank, Sheffield S10 2TH, UK*

- Meena Balasubramanian
- Stuart Ingram
- Diana Johnson
- Louise Nevitt
- Michael J. Parker
- Oliver Quarrell
- Emma Shearing
- Kath Smith
- Cat Taylor

*12. Manchester Centre for Genomic Medicine, St Mary's Hospital, Central Manchester University Hospitals NHS Foundation Trust, Manchester Academic Health Science Centre, Manchester M13 9WL, UK*

- Siddharth Banka
- Kate Chandler
- Jill Clayton-Smith
- Yanick Crow
- Dian Donnai
- Carina Donnelly
- Sofia Douzgou
- Lorraine Gaunt
- Elizabeth Jones
- Bronwyn Kerr
- Helen Kingston
- Kay Metcalfe
- Emma Miles
- Helen Murphy
- Zara Skitt

*13. North East Thames Regional Genetics Service, Great Ormond Street Hospital for Children NHS Foundation Trust, Great Ormond Street Hospital, Great Ormond Street, London WC1N 3JH, UK*

- Angela Barnicoat
- Maria Bitner-Glindzicz
- Kate Brunstrom
- Georgina Hollingsworth
- Jane Hurst
- Lucy Jenkins
- V. K. Ajith Kumar
- Melissa Lees
- Alison Male
- Elisabeth Rosser
- Richard Scott
- Jonathon Waters
- Louise Wilson

*14. North of Scotland Regional Genetics Service, NHS Grampian, Department of Medical Genetics Medical School, Foresterhill, Aberdeen AB25 2ZD, UK*

- Paul Batstone
- Mariella D'Alessandro
- John Dean
- Ruth McGowan
- Catherine McWilliam
- Zosia Miedzybrodzka
- Alison Ross
- Shalaka Samant

*15. East of Scotland Regional Genetics Service, Human Genetics Unit, Pathology Department, NHS Tayside, Ninewells Hospital, Dundee DD1 9SY, UK*

- David Baty
- Jonathan Berg
- David Goudie
- Norman Pratt
- Debbie Rice
- Susann Schweiger

*16. Yorkshire Regional Genetics Service, Leeds Teaching Hospitals NHS Trust, Department of Clinical Genetics, Chapel Allerton Hospital, Chapeltown Road, Leeds LS7 4SA, UK*

- Chris Bennett
- Moira Blyth
- Andrea Coates
- Angus Dobbie
- Sarah Hewitt
- Emma Hobson
- Alison Kraus
- Katrina Prescott
- Paul Roberts
- Eamonn Sheridan
- Audrey Smith
- Miranda Squires
- Jenny Thomson

*17. North West Thames Regional Genetics Centre, North West London Hospitals NHS Trust, The Kennedy Galton Centre, Northwick Park and St Mark's NHS Trust Watford Road, Harrow HA1 3UJ, UK*

- Birgitta Bernhard
- Louise Bourdon
- Angela Brady
- Natalie Canham
- Virginia Clowes
- Neeti Ghali
- Muriel Holder
- Susan Holder
- Stewart Payne
- Cheryl Sequeira
- Roldan Singzon
- Anthony Vandersteen
- Emma Wakeling

*18. Oxford Regional Genetics Service, Oxford Radcliffe Hospitals NHS Trust, The Churchill Old Road, Oxford OX3 7LJ, UK*

- Edward Blair
- Deirdre Cilliers

- Susan Clasper
- Richard Gibbons
- Usha Kini
- Andrea Nemeth
- Julie Phipps
- Joanna Poulton
- Sue Price
- Abigail Pridham
- Hellen Purnell
- Anneke Seller
- Debbie Shears
- Helen Stewart

*19. West Midlands Regional Genetics Service, Birmingham Women's NHS Foundation Trust, Birmingham Women's Hospital, Edgbaston, Birmingham B15 2TG, UK*

- David Bohanna
- Trevor Cole
- Nicola Cooper
- Helen Cox
- Lily Islam
- Joanna Jarvis
- Gail Kirby
- Derek Lim
- Kirsten McKay
- Dominic J. McMullan
- Jenny Morton
- Swati Naik
- Andrew Norman
- Kai-Ren Ong
- Chirag Patel
- Nicola Ragge
- Saba Sharif
- Mark Tein
- Julie Vogt
- Denise Williams

*20. Northern Genetics Service, Newcastle upon Tyne Hospitals NHS Foundation Trust, Institute of Human Genetics, International Centre for Life, Central Parkway, Newcastle upon Tyne NE1 3BZ, UK*

- David Bourn
- John Burn
- Richard Fisher
- Judith Goodship
- Stephen Hellens
- Alex Henderson



- Tara Montgomery
- Linda Sneddon
- Miranda Splitt
- Volker Straub
- Michael Wright
- Laura Yates

*21. Northern Ireland Regional Genetics Centre, Belfast Health and Social Care Trust, Belfast City Hospital, Lisburn Road, Belfast BT9 7AB, UK*

- Lisa Bradley
- Tabib Dabir
- Deirdre Donnelly
- Mervyn Humphreys
- Claire Kirk
- Alex Magee
- Vivienne McConnell
- Shane McKee
- Susan McNerlan
- Fiona Stewart

*22. Peninsula Clinical Genetics Service, Royal Devon and Exeter NHS Foundation Trust, Clinical Genetics Department, Royal Devon Exeter Hospital (Heavitree), Gladstone Road, Exeter EX1 2ED, UK*

- Carole Brewer
- , Bruce Castle
- , Gemma Devlin
- , Sian Ellard
- , Sarah Everest
- , Emma Kivuva
- , Julia Rankin
- , Charles Shaw-Smith
- , Claire Turner
- , Peter Turnpenny
- Carolyn Tysoe

*23. South East Thames Regional Genetics Centre, Guy's and St Thomas' NHS Foundation Trust, Guy's Hospital, Great Maze Pond, London SE1 9RT, UK*

- Fiona Connell
- Charu Deshpande
- Tina Fendick
- Frances Flinter
- Melita Irving
- Dragana Josifova
- Caroline Langman
- Shehla Mohammed
- Caroline Ogilvie
- Leema Robert

- Michael Yau
24. *Leicestershire Genetics Centre, University Hospitals of Leicester NHS Trust, Leicester Royal Infirmary (NHS Trust), Leicester LE1 5WW, UK*
- Lara Cresswell
  - Beckie Kaemba
  - Sandra Kazembe
  - Pradeep Vasudevan
25. *Nottingham Regional Genetics Service, City Hospital Campus, Nottingham University Hospitals NHS Trust, The Gables, Hucknall Road, Nottingham NG5 1PB, UK*
- Gareth Cross
  - Abhijit Dixit
  - Jacqueline Eason
  - Rachel Harrison
  - Katherine Martin
  - Ajoy Sarkar
  - Ann Selby
  - Nora Shannon
  - Mohnish Suri
26. *West of Scotland Regional Genetics Service, NHS Greater Glasgow and Clyde, Institute of Medical Genetics, Yorkhill Hospital, Glasgow G3 8SJ, UK*
- Rosemarie Davidson
  - Alexis Duncan
  - Carol Gardiner
  - Shelagh Joss
  - Esther Kinning
  - Cheryl Longman
  - Gordon Lowther
  - Victoria Murday
  - Daniela T. Pilz
  - Margo Whiteford
  - Nicola Williams
27. *Bristol Genetics Service (Avon, Somerset, Gloucs and West Wilts), University Hospitals Bristol NHS Foundation Trust, St Michael's Hospital, St Michael's Hill, Bristol BS2 8DT, UK*
- Alan Donaldson
  - Rose Hawkins
  - Ruth Newbury-Ecob
  - Eileen Roberts
  - Ingrid Scurr
  - Sarah Smithson
  - Susan Tomkins
  - Christopher Wragg

28. *Merseyside and Cheshire Genetics Service, Liverpool Women's NHS Foundation Trust, Department of Clinical Genetics, Royal Liverpool Children's Hospital Alder Hey, Eaton Road, Liverpool L12 2AP, UK*

- Angela Douglas
- Ian Ellis
- Alan Fryer
- Lynn Greenhalgh
- Una Maye
- Gillian Roberts
- Vivienne Sutton
- Elizabeth Sweeney
- Astrid Weber

29. *National Centre for Medical Genetics, Our Lady's Children's Hospital, Crumlin, Dublin 12, Ireland*

- Harinder Gill
- Andrew Green
- Sally A. Lynch
- Rosie O'Shea

30. *Department of Clinical Genetics, Block 12, Glan Clwyd Hospital, Rhyl, Denbighshire LL18 5UJ, Wales, UK*

- Emma McCann
- Caroline Pottinger

31. *Nuffield Department of Obstetrics Gynaecology, University of Oxford, Level 3, Women's Centre, John Radcliffe Hospital, Oxford OX3 9DU, UK*

- Chris Nellåker

32. *Institute of Biomedical Engineering, Department of Engineering Science, University of Oxford, Old Road Campus Research Building, Oxford OX3 7DQ, UK*

- Chris Nellåker

33. *Big Data Institute, University of Oxford, Roosevelt drive, Oxford OX3 7LF, UK*

- Chris Nellåker

34. *The Ethox Centre, Nuffield Department of Population Health, University of Oxford, Old Road Campus, Oxford OX3 7LF, UK*

- Michael Parker
